# Supplementary material for: Accelerating computations of organometallic reaction energies through hybrid basis sets
Source: Royal Society of Chemistry journal article supplement (doi:10.1039/d3qi00136a), 2023-01-01
Supplement: d3qi00136a1.xlsx [file d3qi00136a1.xlsx]

## Sheet: README
Statistical parameters presented at the end of the spreadsheets include data for reactions 8 and 9. In the manuscript,
these reactions were excluded. For details, see computational methods

## Sheet: def2_SVP
MOBH35		(a) J. Phys. Chem. A 2019, 123, 3761-3781
		(b) J. Phys. Chem. A 2019, 123, 6379-6380			* reference values quoted from (b)
DFA: revDOD-PBEP86-D4			BASIS SET: def2-TZVP(-F)
REFERENCE VALUES (kcal/mol)*					STRUCTURES & CALCULATED ENERGIES (revDOD-PBEP86-D4/def2-TZVP(-F)) in hartree							CALCULATED (revDOD-PBEP86-D4/def2-TZVP(-F)) in kcal/mol					ABSOLUTE DEVATION				ARE
REACTION	FWD Barrier	REV Barrier	Reaction Energy		REACTANT		TS		PRODUCT			REACTION	FWD Barrier	REV Barrier	Reaction Energy		FWD Barrier	REV Barrier	Reaction Energy		FWD Barrier	REV Barrier	Reaction Energy
1	26.03	15.4	10.63		r1+	-1857.89	ts1+	-1857.85	p1+	-1857.87		1	26.3295	15.1872	11.1423		0.29951	0.212774	0.512284		1.15064	1.38165	4.81923
2	5.58	22.11	-16.53		r2+	-1688.65	ts2+	-1688.64	p2+	-1688.68		2	5.75783	25.4463	-19.6884		0.177833	3.33628	3.15845		3.18697	15.0895	19.1074
3	0.91	27.21	-26.3		r3	-1269.2	ts3	-1269.2	p3	-1269.25		3	1.08646	28.204	-27.1176		0.176462	0.994019	0.817558		19.3914	3.65314	3.10858
4	1.49	8.85	-7.37		r4	-1231.25	ts4	-1231.25	p4	-1231.26		4	2.62659	10.1625	-7.53592		1.13659	1.31251	0.16592		76.2814	14.8307	2.25128
5	4.47	22.77	-18.29		r5	-2743.54	ts5	-2743.53	p5	-2743.57		5	3.3306	26.4467	-23.1161		1.1394	3.67674	4.82614		25.49	16.1473	26.3868
6	15.77	14.25	1.52		r6	-2596	ts6	-2595.98	p6_r7	-2596		6	13.5533	11.9669	1.5863		2.21675	2.28305	0.0663019		14.0567	16.0214	4.36197
7	27.94	18.47	9.47		p6_r7	-2596	ts7	-2595.96	p7	-2595.98		7	24.5947	16.7802	7.81445		3.3453	1.68975	1.65555		11.9731	9.14862	17.482
8	37.28	35.82	1.46		r8	-2623.44	ts8	-2623.37	p8_r9	-2623.43		8	40.3994	37.1525	3.2469		3.11939	1.33249	1.7869		8.36745	3.71996	122.39
9	33	4.93	28.07		p8_r9	-2623.43	ts9	-2623.38	p9	-2623.4		9	32.3813	13.5404	18.841		0.618657	8.61037	9.22903		1.87472	174.653	32.8786
10	-5.28	7.67	-12.95		r10	-1141.77	ts10	-1141.77	p10	-1028.78		10	-2.45752	8.17061	-10.6281		2.82248	0.500606	2.32187		53.456	6.5268	17.9295
									CO	-113.009
11	34.8	89.6	-54.8		r11	-1247.09	ts11	-1247.03	p11	-1247.18		11	35.2666	90.8009	-55.5343		0.466588	1.2009	0.734311		1.34077	1.34029	1.33998
12	-0.63	31.02	-31.65		r12	-1797.54	ts12	-1797.54	p12	-1797.59		12	1.19414	32.6623	-31.4682		1.82414	1.64231	0.181838		289.547	5.29435	0.574528
13	22.41	49.69	-27.28		r13	-1681.11	ts13	-1681.08	p13	-1681.16		13	19.6349	48.4556	-28.8207		2.77509	1.23437	1.54072		12.3833	2.48415	5.6478
14	10.33	14.46	-4.13		r14	-1163.45	ts14	-1163.44	p14	-1163.46		14	10.1544	12.3614	-2.20696		0.175601	2.09864	1.92304		1.69992	14.5134	46.5627
15	20.27	77.23	-56.96		r15	-988.621	ts15	-988.585	p15	-988.702		15	22.8354	73.331	-50.4957		2.56535	3.89898	6.46433		12.6559	5.04853	11.3489
16	34.22	55.4	-21.18		r16	-513.408	ts16	-513.35	p16	-513.441		16	36.1742	56.7886	-20.6144		1.95416	1.38857	0.565593		5.71059	2.50645	2.67041
17	21.48	35.47	-13.99		r17	-4988.78	ts17	-4988.74	p17	-4410.91		17	24.8774	31.6768	-6.79938		3.3974	3.79322	7.19062		15.8166	10.6942	51.3983
									PEt3	-577.878
18	25.34	36.05	-10.72		r18	-2713.04	ts18	-2713	p18	-2135.17		18	25.6337	29.517	-3.88326		0.293735	6.533	6.83674		1.15917	18.1221	63.7755
									PEt3	-577.878
19	12.27	35.81	-23.54		r19	-4987.52	ts19	-4987.5	p19	-4409.67		19	13.8372	32.1331	-18.2959		1.56718	3.67694	5.24412		12.7724	10.2679	22.2775
									PEt3	-577.878
20	13.36	37.72	-24.36		r20	-2711.78	ts20	-2711.76	p20	-2133.93		20	9.85498	29.7234	-19.8685		3.50502	7.99656	4.49154		26.2352	21.1998	18.4382
									PEt3	-577.878
21	9.18	9.2	-0.02		r21	-710.536	ts21	-710.518	p21	-710.536		21	11.3184	11.3183	7.59344e-05		2.13836	2.11829	0.0200759		23.2937	23.0248	100.38
22	14.3	29.05	-14.75		r22	-960.532	ts22	-960.508	p22	-960.559		22	14.8835	31.4732	-16.5897		0.583537	2.42323	1.83969		4.08068	8.34159	12.4725
23	30.71	21.19	9.52		r23	-1011.78	ts23	-1011.74	p23	-1011.77		23	28.4481	20.3237	8.12446		2.26188	0.866347	1.39554		7.3653	4.08847	14.659
24	2.87	16.96	-14.1		r24	-2263.33	ts24	-2263.32	p24	-2263.35		24	1.75327	17.4288	-15.6756		1.11673	0.468834	1.57556		38.9104	2.76435	11.1742
25	2.66	12.01	-9.35		r25	-2189.74	ts25	-2189.74	p25	-2189.76		25	2.08122	13.286	-11.2048		0.578777	1.276	1.85478		21.7585	10.6245	19.8372
26	25.39	0.19	25.2		r26	-1126.54	ts26	-1126.5	p26	-1126.5		26	21.8781	0.214099	21.664		3.51192	0.0240985	3.53602		13.8319	12.6834	14.0318
27	13.76	2.39	11.37		r27	-1208.33	ts27	-1208.31	p27	-1208.31		27	16.1416	1.28901	14.8526		2.38164	1.10099	3.48264		17.3085	46.0667	30.6301
28	29.06	16.63	12.43		r28	-1653.37	ts28	-1653.32	p28	-1653.35		28	28.8423	14.6759	14.1664		0.217732	1.95412	1.73639		0.749249	11.7506	13.9694
29	14.95	30.89	-15.93		r29	-1654.53	ts29	-1654.51	p29	-1654.56		29	14.7241	30.7452	-16.0211		0.22587	0.144776	0.0910946		1.51084	0.468681	0.571843
30	9.88	17.22	-7.34		r30_31	-1062.03	ts30	-1062.01	p30	-1062.04		30	10.8904	19.1672	-8.27678		1.01043	1.9472	0.936777		10.227	11.3078	12.7626
31	3.25	13.34	-10.08		r30_r31	-1062.03	ts31	-1062.02	p31	-1062.04		31	3.35119	11.6854	-8.33418		0.101187	1.65463	1.74582		3.11344	12.4035	17.3196
32	19.16	64.57	-45.4		r32+	-997.166	ts32+	-997.127	p32+	-997.223		32	24.2558	60.4066	-36.1509		5.09575	4.16339	9.24915		26.5958	6.44787	20.3726
33	1.26	7.83	-6.57		r33+	-272.581	ts33+	-272.576	p33+	-272.591		33	2.68381	9.15621	-6.4724		1.42381	1.32621	0.0975988		113	16.9375	1.48552
34	29.15	2.91	26.24		r34	-860.417	ts34	-860.37	p34_r35	-860.377		34	29.3762	4.1044	25.2718		0.226248	1.1944	0.968153		0.77615	41.0447	3.68961
35	18.31	-1.41	19.72		p34_r35	-860.377	ts35	-860.351	p35	-819.963		35	15.9179	-3.40437	19.3223		2.39209	1.99437	0.397713		13.0644	141.445	2.0168
									CH4	-40.3834
																MAD	2.0171			%MARE	22.3076
																max	9.24915			max	289.547
																SD	1.90956			SD	39.1333

## Sheet: def2_TZVP_F
MOBH35		(a) J. Phys. Chem. A 2019, 123, 3761-3781
		(b) J. Phys. Chem. A 2019, 123, 6379-6380			* reference values quoted from (b)
DFA: revDOD-PBEP86-D4			BASIS SET: def2-TZVP(-F)
REFERENCE VALUES (kcal/mol)*					STRUCTURES & CALCULATED ENERGIES (revDOD-PBEP86/def2-TZVP(-F)) in hartree							CALCULATED (revDOD-PBEP86/def2-TZVP(-F)) in kcal/mol					ABSOLUTE DEVATION				ARE
REACTION	FWD Barrier	REV Barrier	Reaction Energy		REACTANT		TS		PRODUCT			REACTION	FWD Barrier	REV Barrier	Reaction Energy		FWD Barrier	REV Barrier	Reaction Energy		FWD Barrier	REV Barrier	Reaction Energy
1	26.03	15.4	10.63		r1+	-1859.35	ts1+	-1859.31	p1+	-1859.33		1	27.4908	16.1455	11.3453		1.46076	0.745504	0.715255		5.61183	4.84093	6.72864
2	5.58	22.11	-16.53		r2+	-1689.91	ts2+	-1689.89	p2+	-1689.93		2	6.53198	23.0486	-16.5166		0.951985	0.938599	0.0133855		17.0607	4.24513	0.0809768
3	0.91	27.21	-26.3		r3	-1269.89	ts3	-1269.89	p3	-1269.93		3	1.21644	25.5558	-24.3394		0.30644	1.65419	1.96063		33.6747	6.07935	7.45487
4	1.49	8.85	-7.37		r4	-1231.89	ts4	-1231.89	p4	-1231.9		4	2.42039	7.74209	-5.32169		0.930395	1.10791	2.04831		62.4426	12.5188	27.7925
5	4.47	22.77	-18.29		r5	-2745.16	ts5	-2745.16	p5	-2745.2		5	4.43298	27.9263	-23.4933		0.0370216	5.15629	5.20331		0.828224	22.6451	28.4489
6	15.77	14.25	1.52		r6	-2597.32	ts6	-2597.3	p6_r7	-2597.32		6	15.1228	14.8509	0.271972		0.647162	0.600865	1.24803		4.10376	4.2166	82.1071
7	27.94	18.47	9.47		p6_r7	-2597.32	ts7	-2597.28	p7	-2597.31		7	26.187	18.5535	7.63354		1.75298	0.0834866	1.83646		6.27408	0.452012	19.3924
8	37.28	35.82	1.46		r8	-2625.35	ts8	-2625.29	p8_r9	-2625.35		8	37.9696	37.4292	0.540457		0.689649	1.60919	0.919543		1.84992	4.49244	62.9824
9	33	4.93	28.07		p8_r9	-2625.35	ts9	-2625.3	p9	-2625.32		9	29.5654	12.8159	16.7495		3.43464	7.88588	11.3205		10.408	159.957	40.3296
10	-5.28	7.67	-12.95		r10	-1143.11	ts10	-1143.12	p10	-1029.97		10	-3.53457	10.1038	-13.6384		1.74543	2.43378	0.688356		33.0573	31.7312	5.31549
									CO	-113.165
11	34.8	89.6	-54.8		r11	-1248.61	ts11	-1248.56	p11	-1248.7		11	34.3127	90.0158	-55.7031		0.487294	0.415779	0.903072		1.40027	0.464039	1.64794
12	-0.63	31.02	-31.65		r12	-1798.9	ts12	-1798.9	p12	-1798.95		12	-0.384525	30.8977	-31.2822		0.245475	0.122345	0.36782		38.9642	0.394408	1.16215
13	22.41	49.69	-27.28		r13	-1682.55	ts13	-1682.52	p13	-1682.6		13	20.3389	48.2379	-27.8989		2.07105	1.45213	0.61892		9.24165	2.92239	2.26877
14	10.33	14.46	-4.13		r14	-1164.57	ts14	-1164.56	p14	-1164.58		14	9.81708	14.4676	-4.65055		0.512919	0.00762939	0.520549		4.96534	0.0527621	12.6041
15	20.27	77.23	-56.96		r15	-989.195	ts15	-989.161	p15	-989.275		15	21.4638	72.0003	-50.5365		1.1938	5.22969	6.42349		5.88949	6.77158	11.2772
16	34.22	55.4	-21.18		r16	-513.975	ts16	-513.919	p16	-514.005		16	35.5291	54.1643	-18.6352		1.30906	1.23574	2.5448		3.82542	2.23058	12.0151
17	21.48	35.47	-13.99		r17	-4991.12	ts17	-4991.08	p17	-4412.83		17	23.4709	30.4125	-6.94156		1.99091	5.05752	7.04844		9.26869	14.2586	50.382
									PEt3	-578.296
18	25.34	36.05	-10.72		r18	-2715.23	ts18	-2715.18	p18	-2136.94		18	25.5567	30.3716	-4.81485		0.216722	5.67842	5.90515		0.855258	15.7515	55.0853
									PEt3	-578.296
19	12.27	35.81	-23.54		r19	-4989.86	ts19	-4989.84	p19	-4411.59		19	13.5503	30.8652	-17.3149		1.28026	4.9448	6.22506		10.4341	13.8084	26.4446
									PEt3	-578.296
20	13.36	37.72	-24.36		r20	-2713.96	ts20	-2713.94	p20	-2135.69		20	11.4038	30.725	-19.3212		1.95625	6.99502	5.03877		14.6426	18.5446	20.6846
									PEt3	-578.296
21	9.18	9.2	-0.02		r21	-711.408	ts21	-711.394	p21	-711.408		21	9.10342	9.10342	0		0.076582	0.096582	0.02		0.834227	1.0498	100
22	14.3	29.05	-14.75		r22	-961.711	ts22	-961.687	p22	-961.732		22	15.078	28.2304	-13.1524		0.778022	0.819553	1.59758		5.44072	2.82118	10.831
23	30.71	21.19	9.52		r23	-1013	ts23	-1012.95	p23	-1012.98		23	30.5098	19.6837	10.8261		0.200229	1.50631	1.30608		0.652	7.1086	13.7194
24	2.87	16.96	-14.1		r24	-2265.49	ts24	-2265.49	p24	-2265.52		24	2.41647	15.754	-13.3376		0.453534	1.20596	0.762426		15.8026	7.11061	5.40727
25	2.66	12.01	-9.35		r25	-2191.82	ts25	-2191.82	p25	-2191.84		25	2.6522	11.4669	-8.81466		0.00779817	0.54314	0.535342		0.293164	4.5224	5.72559
26	25.39	0.19	25.2		r26	-1127.3	ts26	-1127.26	p26	-1127.26		26	23.2732	0.12166	23.1515		2.11682	0.0683398	2.04848		8.33721	35.9683	8.12888
27	13.76	2.39	11.37		r27	-1209.2	ts27	-1209.18	p27	-1209.18		27	14.7036	1.82414	12.8794		0.943569	0.565861	1.50943		6.85733	23.6762	13.2755
28	29.06	16.63	12.43		r28	-1654.76	ts28	-1654.72	p28	-1654.74		28	28.0936	14.0585	14.035		0.966447	2.57146	1.60501		3.32569	15.4628	12.9124
29	14.95	30.89	-15.93		r29	-1655.94	ts29	-1655.91	p29	-1655.96		29	13.8231	29.9498	-16.1266		1.12687	0.940237	0.196633		7.53759	3.04382	1.23435
30	9.88	17.22	-7.34		r30_31	-1062.95	ts30	-1062.93	p30	-1062.96		30	11.3397	18.4036	-7.06386		1.45973	1.18359	0.276139		14.7746	6.87333	3.76211
31	3.25	13.34	-10.08		r30_r31	-1062.95	ts31	-1062.94	p31	-1062.97		31	3.51021	13.3075	-9.79728		0.26021	0.0325062	0.282716		8.00647	0.243675	2.80473
32	19.16	64.57	-45.4		r32+	-997.702	ts32+	-997.667	p32+	-997.765		32	21.8826	62.029	-40.1464		2.72256	2.54104	5.2536		14.2096	3.93532	11.5718
33	1.26	7.83	-6.57		r33+	-272.833	ts33+	-272.83	p33+	-272.841		33	1.99418	7.04354	-5.04936		0.734181	0.78646	1.52064		58.2683	10.0442	23.1452
34	29.15	2.91	26.24		r34	-861.388	ts34	-861.338	p34_r35	-861.344		34	31.1421	3.46055	27.6816		1.99215	0.550551	1.4416		6.83412	18.9193	5.49389
35	18.31	-1.41	19.72		p34_r35	-861.344	ts35	-861.318	p35	-820.879		35	16.3344	-1.69013	18.0245		1.97563	0.280127	1.69551		10.7899	19.8672	8.59791
									CH4	-40.4365
																MAD	1.6194			%MARE	15.4724
																max	11.3205			max	159.957
																SD	1.83967			SD	22.5293

## Sheet: def2_TZVP
MOBH35		(a) J. Phys. Chem. A 2019, 123, 3761-3781
		(b) J. Phys. Chem. A 2019, 123, 6379-6380			* reference values quoted from (b)
DFA: revDOD-PBEP86-D4			BASIS SET: def2-TZVP
REFERENCE VALUES (kcal/mol)*					STRUCTURES & CALCULATED ENERGIES (revDOD-PBEP86/def2-TZVP) in hartree							CALCULATED (revDOD-PBEP86/def2-TZVP) in kcal/mol					ABSOLUTE DEVATION				ARE
REACTION	FWD Barrier	REV Barrier	Reaction Energy		REACTANT		TS		PRODUCT			REACTION	FWD Barrier	REV Barrier	Reaction Energy		FWD Barrier	REV Barrier	Reaction Energy		FWD Barrier	REV Barrier	Reaction Energy
1	26.03	15.4	10.63		r1+	-1859.54	ts1+	-1859.49	p1+	-1859.52		1	26.8751	15.8499	11.0252		0.845094	0.449906	0.395189		3.24662	2.92147	3.71767
2	5.58	22.11	-16.53		r2+	-1690.06	ts2+	-1690.05	p2+	-1690.08		2	6.45679	22.9674	-16.5107		0.876785	0.857445	0.0193405		15.713	3.87809	0.117002
3	0.91	27.21	-26.3		r3	-1269.96	ts3	-1269.96	p3	-1270		3	1.23716	26.06	-24.8228		0.327164	1.14999	1.47715		35.9521	4.22635	5.61656
4	1.49	8.85	-7.37		r4	-1231.95	ts4	-1231.95	p4	-1231.96		4	2.35119	8.18562	-5.83442		0.861193	0.664385	1.53558		57.7982	7.50717	20.8355
5	4.47	22.77	-18.29		r5	-2745.33	ts5	-2745.33	p5	-2745.37		5	4.44577	27.407	-22.9612		0.0242262	4.637	4.67123		0.541973	20.3645	25.5398
6	15.77	14.25	1.52		r6	-2597.45	ts6	-2597.43	p6_r7	-2597.45		6	15.3019	14.386	0.915894		0.46807	0.136037	0.604106		2.9681	0.954643	39.7438
7	27.94	18.47	9.47		p6_r7	-2597.45	ts7	-2597.41	p7	-2597.44		7	25.8253	18.4996	7.32565		2.11472	0.0296308	2.14435		7.5688	0.160426	22.6436
10	-5.28	7.67	-12.95		r10	-1143.26	ts10	-1143.27	p10	-1030.1		10	-2.7103	8.83581	-11.5461		2.5697	1.16581	1.40389		48.6685	15.1995	10.8409
									CO	-113.181
11	34.8	89.6	-54.8		r11	-1248.82	ts11	-1248.76	p11	-1248.9		11	35.4391	90.1612	-54.722		0.639121	0.561168	0.0779533		1.83656	0.626303	0.142251
12	-0.63	31.02	-31.65		r12	-1799.06	ts12	-1799.06	p12	-1799.11		12	-0.505371	31.2414	-31.7468		0.124629	0.221439	0.0968103		19.7823	0.713859	0.305878
13	22.41	49.69	-27.28		r13	-1682.73	ts13	-1682.7	p13	-1682.78		13	19.3399	48.6031	-29.2633		3.07014	1.08687	1.98327		13.6999	2.1873	7.27007
14	10.33	14.46	-4.13		r14	-1164.71	ts14	-1164.69	p14	-1164.71		14	10.1861	14.1339	-3.94783		0.143899	0.326072	0.182173		1.39302	2.255	4.41097
15	20.27	77.23	-56.96		r15	-989.254	ts15	-989.22	p15	-989.335		15	21.272	72.647	-51.3749		1.00204	4.58303	5.58508		4.94349	5.93427	9.80526
16	34.22	55.4	-21.18		r16	-514.046	ts16	-513.988	p16	-514.074		16	35.8444	53.8548	-18.0104		1.62438	1.54521	3.16959		4.74688	2.78918	14.965
17	21.48	35.47	-13.99		r17	-4991.38	ts17	-4991.34	p17	-4413.05		17	23.4604	31.0495	-7.58903		1.98044	4.42052	6.40097		9.21994	12.4627	45.7539
									PEt3	-578.343
18	25.34	36.05	-10.72		r18	-2715.47	ts18	-2715.43	p18	-2137.13		18	25.3261	30.5417	-5.2156		0.216722	5.50833	5.5044		0.855258	15.2797	51.347
									PEt3	-578.343
19	12.27	35.81	-23.54		r19	-4990.12	ts19	-4990.1	p19	-4411.81		19	14.4443	31.4813	-17.037		2.1743	4.32869	6.50299		17.7204	12.0879	27.6253
									PEt3	-578.343
20	13.36	37.72	-24.36		r20	-2714.2	ts20	-2714.18	p20	-2135.89		20	12.2602	30.8823	-18.6221		1.09976	6.83771	5.73794		8.23176	18.1275	23.5548
									PEt3	-578.343
21	9.18	9.2	-0.02		r21	-711.515	ts21	-711.5	p21	-711.515		21	9.11652	9.11864	-0.00211991		0.063477	0.0813571	0.0178801		0.69147	0.884316	89.4004
22	14.3	29.05	-14.75		r22	-961.859	ts22	-961.835	p22	-961.88		22	15.1313	28.4548	-13.3234		0.831342	0.595249	1.42659		5.81358	2.04905	9.6718
23	30.71	21.19	9.52		r23	-1013.16	ts23	-1013.11	p23	-1013.14		23	30.5749	19.661	10.9139		0.135063	1.52897	1.39391		0.439801	7.21553	14.6419
24	2.87	16.96	-14.1		r24	-2265.77	ts24	-2265.76	p24	-2265.79		24	2.90897	15.3124	-12.4034		0.0389724	1.64759	1.69656		1.35792	9.71456	12.0323
25	2.66	12.01	-9.35		r25	-2192.08	ts25	-2192.07	p25	-2192.09		25	3.09789	11.2192	-8.12133		0.437894	0.790773	1.22867		16.4622	6.58429	13.1408
26	25.39	0.19	25.2		r26	-1127.38	ts26	-1127.34	p26	-1127.34		26	23.0734	0.119897	22.9535		2.31661	0.0701033	2.2465		9.12409	36.8965	8.91469
27	13.76	2.39	11.37		r27	-1209.29	ts27	-1209.27	p27	-1209.27		27	14.1145	1.87085	12.2436		0.354485	0.51915	0.873634		2.5762	21.7217	7.68368
28	29.06	16.63	12.43		r28	-1654.93	ts28	-1654.89	p28	-1654.91		28	27.9096	14.4225	13.4872		1.15037	2.20753	1.05716		3.95861	13.2744	8.50488
29	14.95	30.89	-15.93		r29	-1656.1	ts29	-1656.08	p29	-1656.13		29	14.2692	29.798	-15.5288		0.680801	1.092	0.401197		4.55385	3.53512	2.5185
30	9.88	17.22	-7.34		r30_31	-1063.06	ts30	-1063.04	p30	-1063.07		30	11.2702	18.235	-6.9648		1.39024	1.01503	0.375202		14.0712	5.89451	5.11175
31	3.25	13.34	-10.08		r30_r31	-1063.06	ts31	-1063.06	p31	-1063.08		31	3.95664	13.0461	-9.08941		0.706642	0.293948	0.99059		21.7428	2.20351	9.82728
32	19.16	64.57	-45.4		r32+	-997.757	ts32+	-997.723	p32+	-997.823		32	21.5369	62.7713	-41.2343		2.37694	1.79873	4.16567		12.4057	2.78571	9.17549
33	1.26	7.83	-6.57		r33+	-272.855	ts33+	-272.852	p33+	-272.863		33	2.01786	6.72761	-4.70975		0.757859	1.10239	1.86025		60.1476	14.079	28.3143
34	29.15	2.91	26.24		r34	-861.523	ts34	-861.473	p34_r35	-861.478		34	31.3699	3.16585	28.204		2.21987	0.255851	1.96402		7.61534	8.79212	7.48483
35	18.31	-1.41	19.72		p34_r35	-861.478	ts35	-861.452	p35	-821.008		35	16.5291	-1.55722	18.0863		1.7809	0.14722	1.63368		9.72639	10.4411	8.28439
									CH4	-40.4414
																MAD	1.44914			%MARE	12.6087
																max	6.83771			max	89.4004
																SD	1.513			SD	14.9061

## Sheet: def2_TZVPP
MOBH35		(a) J. Phys. Chem. A 2019, 123, 3761-3781
		(b) J. Phys. Chem. A 2019, 123, 6379-6380			* reference values quoted from (b)
DFA: revDOD-PBEP86-D4			BASIS SET: def2-TZVPP
REFERENCE VALUES (kcal/mol)*					STRUCTURES & CALCULATED ENERGIES (revDOD-PBEP86/def2-TZVPP) in hartree							CALCULATED (revDOD-PBEP86/def2-TZVPP) in kcal/mol					ABSOLUTE DEVATION				ARE
REACTION	FWD Barrier	REV Barrier	Reaction Energy		REACTANT		TS		PRODUCT			REACTION	FWD Barrier	REV Barrier	Reaction Energy		FWD Barrier	REV Barrier	Reaction Energy		FWD Barrier	REV Barrier	Reaction Energy
1	26.03	15.4	10.63		r1+	-1859.62	ts1+	-1859.57	p1+	-1859.6		1	26.7053	15.6353	11.0699		0.675257	0.235349	0.439908		2.59415	1.52824	4.13836
2	5.58	22.11	-16.53		r2+	-1690.14	ts2+	-1690.13	p2+	-1690.16		2	6.50707	22.8251	-16.3181		0.927068	0.715141	0.211927		16.6141	3.23447	1.28208
3	0.91	27.21	-26.3		r3	-1270.01	ts3	-1270.01	p3	-1270.05		3	1.2298	25.6699	-24.4401		0.319799	1.54014	1.85994		35.1428	5.66018	7.072
4	1.49	8.85	-7.37		r4	-1232	ts4	-1232	p4	-1232.01		4	2.39481	7.96647	-5.57166		0.904808	0.883529	1.79834		60.7254	9.98338	24.4008
5	4.47	22.77	-18.29		r5	-2745.46	ts5	-2745.45	p5	-2745.5		5	3.87738	27.2236	-23.3462		0.592616	4.45363	5.05625		13.2576	19.5592	27.6449
6	15.77	14.25	1.52		r6	-2597.55	ts6	-2597.53	p6_r7	-2597.55		6	15.8425	14.2852	1.55729		0.0724937	0.0352013	0.0372924		0.459694	0.247027	2.45345
7	27.94	18.47	9.47		p6_r7	-2597.55	ts7	-2597.51	p7	-2597.54		7	25.9394	18.3234	7.61606		2.00057	0.146633	1.85394		7.16023	0.793899	19.5769
8	37.28	35.82	1.46		r8	-2625.7	ts8	-2625.64	p8_r9	-2625.7		8	38.5282	37.7569	0.77134		1.24819	1.93685	0.68866		3.34816	5.40719	47.1685
9	33	4.93	28.07		p8_r9	-2625.7	ts9	-2625.65	p9	-2625.67		9	30.4233	13.0167	17.4066		2.57668	8.0867	10.6634		7.80813	164.03	37.9885
10	-5.28	7.67	-12.95		r10	-1143.37	ts10	-1143.37	p10	-1030.2		10	-2.81238	9.3611	-12.1735		2.46762	1.6911	0.776519		46.7352	22.0482	5.99628
									CO	-113.181
11	34.8	89.6	-54.8		r11	-1248.9	ts11	-1248.84	p11	-1248.99		11	35.2341	89.996	-54.7619		0.434114	0.395989	0.0381249		1.24746	0.441953	0.069571
12	-0.63	31.02	-31.65		r12	-1799.17	ts12	-1799.17	p12	-1799.22		12	-0.667761	31.0472	-31.7149		0.0377612	0.0271729	0.0649341		5.99384	0.0875979	0.205163
13	22.41	49.69	-27.28		r13	-1682.85	ts13	-1682.81	p13	-1682.89		13	20.426	48.4521	-28.026		1.98396	1.23794	0.746022		8.85301	2.49132	2.73469
14	10.33	14.46	-4.13		r14	-1164.81	ts14	-1164.8	p14	-1164.82		14	10.7573	14.2351	-3.4778		0.427264	0.224934	0.652198		4.13615	1.55556	15.7917
15	20.27	77.23	-56.96		r15	-989.35	ts15	-989.318	p15	-989.435		15	20.5561	73.3876	-52.8315		0.28614	3.84239	4.12853		1.41164	4.97526	7.24812
16	34.22	55.4	-21.18		r16	-514.145	ts16	-514.089	p16	-514.176		16	34.9242	54.361	-19.4368		0.704236	1.03899	1.74322		2.05796	1.87543	8.23052
17	21.48	35.47	-13.99		r17	-4991.57	ts17	-4991.53	p17	-4413.21		17	23.7323	31.0346	-7.30226		2.25232	4.43542	6.68774		10.4857	12.5047	47.8037
									PEt3	-578.373
18	25.34	36.05	-10.72		r18	-2715.66	ts18	-2715.62	p18	-2137.29		18	25.8399	30.6889	-4.84899		0.216722	5.36109	5.87101		0.855258	14.8713	54.7669
									PEt3	-578.373
19	12.27	35.81	-23.54		r19	-4990.31	ts19	-4990.29	p19	-4411.96		19	14.0957	31.4719	-17.3762		1.82571	4.33807	6.16377		14.8794	12.1141	26.1843
									PEt3	-578.373
20	13.36	37.72	-24.36		r20	-2714.39	ts20	-2714.37	p20	-2136.05		20	11.9387	31.0113	-19.0726		1.42131	6.70867	5.28736		10.6385	17.7854	21.7051
									PEt3	-578.373
21	9.18	9.2	-0.02		r21	-711.598	ts21	-711.583	p21	-711.598		21	9.1888	9.19148	-0.00268099		0.00879537	0.00852364	0.017319		0.0958101	0.0926482	86.595
22	14.3	29.05	-14.75		r22	-961.959	ts22	-961.935	p22	-961.98		22	14.9317	28.4576	-13.5259		0.631665	0.59243	1.22409		4.41724	2.03934	8.29895
23	30.71	21.19	9.52		r23	-1013.25	ts23	-1013.2	p23	-1013.24		23	30.0216	19.8582	10.1633		0.688413	1.33176	0.643348		2.24166	6.28486	6.75785
24	2.87	16.96	-14.1		r24	-2265.91	ts24	-2265.9	p24	-2265.93		24	2.95979	15.1894	-12.2296		0.0897924	1.77064	1.87043		3.12865	10.4401	13.2655
25	2.66	12.01	-9.35		r25	-2192.23	ts25	-2192.22	p25	-2192.24		25	3.30939	11.1105	-7.80111		0.649394	0.899499	1.54889		24.4133	7.48958	16.5657
26	25.39	0.19	25.2		r26	-1127.48	ts26	-1127.44	p26	-1127.44		26	23.8977	0.225295	23.6724		1.49229	0.0352945	1.52759		5.87747	18.5761	6.06185
27	13.76	2.39	11.37		r27	-1209.4	ts27	-1209.38	p27	-1209.38		27	14.3744	2.0854	12.289		0.614368	0.304604	0.918972		4.46488	12.7449	8.08242
28	29.06	16.63	12.43		r28	-1655.06	ts28	-1655.02	p28	-1655.04		28	29.2492	14.7772	14.472		0.189167	1.85283	2.04199		0.650954	11.1415	16.4279
29	14.95	30.89	-15.93		r29	-1656.24	ts29	-1656.21	p29	-1656.26		29	15.0229	30.8583	-15.8353		0.0729212	0.0317426	0.0946637		0.487767	0.10276	0.594248
30	9.88	17.22	-7.34		r30_31	-1063.19	ts30	-1063.18	p30	-1063.2		30	10.3383	17.7456	-7.40723		0.458327	0.525561	0.0672341		4.63894	3.05204	0.915996
31	3.25	13.34	-10.08		r30_r31	-1063.19	ts31	-1063.19	p31	-1063.21		31	3.79935	12.3427	-8.54338		0.549354	0.997269	1.53662		16.9032	7.47578	15.2443
32	19.16	64.57	-45.4		r32+	-997.858	ts32+	-997.824	p32+	-997.925		32	21.126	62.9404	-41.8144		1.966	1.62962	3.58562		10.261	2.52381	7.89785
33	1.26	7.83	-6.57		r33+	-272.957	ts33+	-272.955	p33+	-272.967		33	1.45603	7.48604	-6.03001		0.196029	0.343959	0.539988		15.5578	4.39283	8.21899
34	29.15	2.91	26.24		r34	-861.629	ts34	-861.581	p34_r35	-861.587		34	29.9561	3.41842	26.5377		0.80612	0.508421	0.297699		2.76542	17.4715	1.13452
35	18.31	-1.41	19.72		p34_r35	-861.587	ts35	-861.559	p35	-821.107		35	17.2554	-2.1004	19.3558		1.05462	0.690404	0.36422		5.75983	48.9648	1.84696
									CH4	-40.4489
																MAD	1.36849			%MARE	13.0517
																max	10.6634			max	164.03
																SD	1.73447			SD	20.8872

## Sheet: def2_QZVPP
MOBH35		(a) J. Phys. Chem. A 2019, 123, 3761-3781
		(b) J. Phys. Chem. A 2019, 123, 6379-6380			* reference values quoted from (b)
DFA: revDOD-PBEP86-D4			BASIS SET: def2-QZVPP
REFERENCE VALUES (kcal/mol)*					STRUCTURES & CALCULATED ENERGIES (revDOD-PBEP86/def2-QZVPP) in hartree							CALCULATED (revDOD-PBEP86/def2-QZVPP) in kcal/mol					ABSOLUTE DEVATION				ARE
REACTION	FWD Barrier	REV Barrier	Reaction Energy		REACTANT		TS		PRODUCT			REACTION	FWD Barrier	REV Barrier	Reaction Energy		FWD Barrier	REV Barrier	Reaction Energy		FWD Barrier	REV Barrier	Reaction Energy
1	26.03	15.4	10.63		r1+	-1859.86	ts1+	-1859.82	p1+	-1859.84		1	26.4611	15.895	10.566		0.431084	0.495043	0.0639589		1.6561	3.21456	0.601683
2	5.58	22.11	-16.53		r2+	-1690.35	ts2+	-1690.34	p2+	-1690.38		2	6.49191	22.8506	-16.3587		0.911908	0.740646	0.171262		16.3424	3.34982	1.03607
3	0.91	27.21	-26.3		r3	-1270.12	ts3	-1270.12	p3	-1270.16		3	1.23178	26.1309	-24.8991		0.321783	1.07912	1.4009		35.3608	3.9659	5.32663
4	1.49	8.85	-7.37		r4	-1232.11	ts4	-1232.11	p4	-1232.12		4	2.34666	8.22482	-5.87816		0.856664	0.625177	1.49184		57.4943	7.06414	20.2421
5	4.47	22.77	-18.29		r5	-2745.71	ts5	-2745.7	p5	-2745.75		5	3.95271	27.0832	-23.1305		0.517291	4.31318	4.84047		11.5725	18.9424	26.4651
6	15.77	14.25	1.52		r6	-2597.75	ts6	-2597.73	p6_r7	-2597.75		6	16.0237	14.4665	1.55717		0.253691	0.216519	0.037172		1.60869	1.51943	2.44553
7	27.94	18.47	9.47		p6_r7	-2597.75	ts7	-2597.71	p7	-2597.74		7	25.9598	18.3913	7.56847		1.98024	0.0787041	1.90153		7.08746	0.426119	20.0795
8	37.28	35.82	1.46		r8	-2626	ts8	-2625.94	p8_r9	-2626		8	38.2473	37.8837	0.363529		0.967274	2.06374	1.09647		2.59462	5.76143	75.1008
9	33	4.93	28.07		p8_r9	-2626	ts9	-2625.95	p9	-2625.97		9	30.7341	12.8731	17.8609		2.26594	7.94314	10.2091		6.86647	161.118	36.3701
10	-5.28	7.67	-12.95		r10	-1143.6	ts10	-1143.6	p10	-1030.41		10	-2.97709	8.93113	-11.9082		2.30291	1.26113	1.04179		43.6158	16.4423	8.04469
									CO	-113.201
11	34.8	89.6	-54.8		r11	-1249.14	ts11	-1249.09	p11	-1249.23		11	35.1853	89.9131	-54.7279		0.385261	0.313148	0.072113		1.10707	0.349496	0.131593
12	-0.63	31.02	-31.65		r12	-1799.4	ts12	-1799.4	p12	-1799.45		12	-0.687138	30.8409	-31.528		0.0571381	0.17909	0.121952		9.06954	0.577337	0.385314
13	22.41	49.69	-27.28		r13	-1683.08	ts13	-1683.05	p13	-1683.13		13	20.3842	48.3895	-28.0053		2.02583	1.30049	0.725335		9.03983	2.61721	2.65885
14	10.33	14.46	-4.13		r14	-1165	ts14	-1164.98	p14	-1165.01		14	10.7699	14.5938	-3.82392		0.439882	0.133801	0.306081		4.2583	0.925319	7.41116
15	20.27	77.23	-56.96		r15	-989.461	ts15	-989.428	p15	-989.547		15	20.5611	74.184	-53.6229		0.291148	3.04599	3.33714		1.43635	3.94405	5.85874
16	34.22	55.4	-21.18		r16	-514.258	ts16	-514.202	p16	-514.289		16	34.9964	54.3055	-19.3091		0.776428	1.09445	1.87088		2.26893	1.97555	8.83325
17	21.48	35.47	-13.99		r17	-4992.08	ts17	-4992.05	p17	-4413.66		17	22.8157	32.3141	-9.49847		1.33567	3.15587	4.49153		6.2182	8.89728	32.1053
									PEt3	-578.439
18	25.34	36.05	-10.72		r18	-2716.07	ts18	-2716.03	p18	-2137.64		18	25.1725	32.3925	-7.22005		0.216722	3.65745	3.49995		0.855258	10.1455	32.6488
									PEt3	-578.439
19	12.27	35.81	-23.54		r19	-4990.82	ts19	-4990.8	p19	-4412.41		19	13.8097	32.7226	-18.9129		1.53968	3.08743	4.62711		12.5483	8.6217	19.6564
									PEt3	-578.439
20	13.36	37.72	-24.36		r20	-2714.8	ts20	-2714.78	p20	-2136.4		20	12.0476	32.7392	-20.6916		1.31242	4.98084	3.66842		9.82347	13.2048	15.0592
									PEt3	-578.439
21	9.18	9.2	-0.02		r21	-711.752	ts21	-711.737	p21	-711.752		21	9.31395	9.31675	-0.00279884		0.133953	0.116751	0.0172012		1.45918	1.26904	86.0058
22	14.3	29.05	-14.75		r22	-962.16	ts22	-962.137	p22	-962.182		22	14.876	28.5934	-13.7174		0.576017	0.456566	1.03258		4.02809	1.57166	7.00056
23	30.71	21.19	9.52		r23	-1013.46	ts23	-1013.41	p23	-1013.44		23	29.955	19.9475	10.0076		0.754965	1.24254	0.487573		2.45837	5.86379	5.12157
24	2.87	16.96	-14.1		r24	-2266.25	ts24	-2266.25	p24	-2266.27		24	3.03901	15.2267	-12.1877		0.169014	1.73327	1.91229		5.889	10.2198	13.5623
25	2.66	12.01	-9.35		r25	-2192.56	ts25	-2192.56	p25	-2192.57		25	3.38842	11.0785	-7.69009		0.728418	0.931495	1.65991		27.3841	7.756	17.7531
26	25.39	0.19	25.2		r26	-1127.62	ts26	-1127.59	p26	-1127.59		26	23.8916	0.206117	23.6855		1.49838	0.0161174	1.51449		5.90144	8.48284	6.0099
27	13.76	2.39	11.37		r27	-1209.56	ts27	-1209.54	p27	-1209.54		27	14.1851	2.20661	11.9785		0.425129	0.183386	0.608515		3.0896	7.67307	5.35193
28	29.06	16.63	12.43		r28	-1655.3	ts28	-1655.25	p28	-1655.27		28	29.0249	14.6187	14.4061		0.0351481	2.01128	1.97613		0.12095	12.0943	15.8981
29	14.95	30.89	-15.93		r29	-1656.47	ts29	-1656.45	p29	-1656.5		29	14.6915	30.3954	-15.7039		0.258501	0.494624	0.226123		1.7291	1.60124	1.41948
30	9.88	17.22	-7.34		r30_31	-1063.37	ts30	-1063.35	p30	-1063.38		30	10.1718	17.82	-7.64823		0.291776	0.600002	0.308226		2.9532	3.48433	4.19926
31	3.25	13.34	-10.08		r30_r31	-1063.37	ts31	-1063.36	p31	-1063.38		31	3.77496	12.1114	-8.33647		0.524963	1.22857	1.74353		16.1527	9.20966	17.2969
32	19.16	64.57	-45.4		r32+	-997.968	ts32+	-997.935	p32+	-998.036		32	20.8175	63.5279	-42.7104		1.65746	1.04213	2.68959		8.65064	1.61395	5.92421
33	1.26	7.83	-6.57		r33+	-273.03	ts33+	-273.027	p33+	-273.039		33	1.39471	7.41561	-6.0209		0.134713	0.414391	0.549104		10.6915	5.29234	8.35774
34	29.15	2.91	26.24		r34	-861.805	ts34	-861.758	p34_r35	-861.763		34	29.5021	3.27504	26.2271		0.352142	0.365035	0.0128936		1.20803	12.5442	0.0491372
35	18.31	-1.41	19.72		p34_r35	-861.763	ts35	-861.735	p35	-821.274		35	17.7407	-1.87039	19.6111		0.569321	0.460387	0.108934		3.10934	32.6515	0.552404
									CH4	-40.4581
																MAD	1.18201			%MARE	11.8572
																max	10.2091			max	161.118
																SD	1.45761			SD	20.3796
