# Supplementary material for: Accelerating computations of organometallic reaction energies through hybrid basis sets
Source: Royal Society of Chemistry journal article supplement (doi:10.1039/d3qi00136a), 2023-01-01
Supplement: d3qi00136a2.xlsx [file d3qi00136a2.xlsx]

## Sheet: README
Statistical parameters presented at the end of the spreadsheets include data for reactions 8 and 9. In the manuscript,
these reactions were excluded. For details, see computational methods

## Sheet: def2_SV(P)
MOBH35		(a) J. Phys. Chem. A 2019, 123, 3761-3781
		(b) J. Phys. Chem. A 2019, 123, 6379-6380			* reference values quoted from (b)
BASIS SET: def2-SV(P)
REFERENCE VALUES (kcal/mol)*					STRUCTURES & CALCULATED ENERGIES (wB97M-V/def2-SV(P)) in hartree								CALCULATED (wB97M-V/def2-SV(P)) in kcal/mol				ABSOLUTE DEVATION				ARE
REACTION	FWD Barrier	REV Barrier	Reaction Energy		REACTANT		TS		PRODUCT			REACTION	FWD Barrier	REV Barrier	Reaction Energy		FWD Barrier	REV Barrier	Reaction Energy		FWD Barrier	REV Barrier	Reaction Energy
1	26.03	15.4	10.63		r1+	-1860.15	ts1+	-1860.11	p1+	-1860.14		1	27.2359	16.9117	10.3242		1.20593	1.51169	0.305758		4.63286	9.81618	2.87637
2	5.58	22.11	-16.53		r2+	-1690.59	ts2+	-1690.58	p2+	-1690.63		2	5.7904	25.9598	-20.1694		0.210403	3.84976	3.63936		3.77067	17.4118	22.0167
3	0.91	27.21	-26.3		r3	-1270.33	ts3	-1270.32	p3	-1270.38		3	1.02462	34.9102	-33.8855		0.11462	7.70016	7.58554		12.5956	28.299	28.8424
4	1.49	8.85	-7.37		r4	-1232.3	ts4	-1232.3	p4	-1232.32		4	0.254552	16.1384	-15.8838		1.23545	7.28835	8.5138		82.916	82.3543	115.52
5	4.47	22.77	-18.29		r5	-2746.06	ts5	-2746.06	p5	-2746.09		5	2.8846	21.3958	-18.5112		1.5854	1.37416	0.221241		35.4675	6.03495	1.20963
6	15.77	14.25	1.52		r6	-2598.2	ts6	-2598.18	p6_r7	-2598.2		6	10.6911	11.4361	-0.74497		5.07889	2.81392	2.26497		32.206	19.7468	149.011
7	27.94	18.47	9.47		p6_r7	-2598.2	ts7	-2598.16	p7	-2598.19		7	26.712	17.6263	9.08573		1.22801	0.843738	0.384269		4.39516	4.56815	4.05775
8	37.28	35.82	1.46		r8	-2626.36	ts8	-2626.31	p8_r9	-2626.35		8	34.4718	29.0256	5.44621		2.80824	6.79444	3.98621		7.53282	18.9683	273.028
9	33	4.93	28.07		p8_r9	-2626.35	ts9	-2626.3	p9	-2626.3		9	35.8105	3.08459	32.7259		2.8105	1.84541	4.65592		8.51668	37.4323	16.5868
10	-5.28	7.67	-12.95		r10	-1143.56	ts10	-1143.57	p10	-1030.38		10	-3.55777	4.31018	-7.86795		1.72223	3.35982	5.08205		32.618	43.8047	39.2436
									CO	-113.199
11	34.8	89.6	-54.8		r11	-1249.23	ts11	-1249.18	p11	-1249.32		11	37.0345	91.1733	-54.1388		2.2345	1.57333	0.661167		6.42098	1.75595	1.20651
12	-0.63	31.02	-31.65		r12	-1799.72	ts12	-1799.71	p12	-1799.76		12	7.44478	35.2316	-27.7868		8.07478	4.21156	3.86322		1281.71	13.5769	12.2061
13	22.41	49.69	-27.28		r13	-1683.43	ts13	-1683.39	p13	-1683.47		13	24.609	51.4067	-26.7977		2.19901	1.71669	0.482314		9.81261	3.4548	1.76801
14	10.33	14.46	-4.13		r14	-1165.09	ts14	-1165.09	p14	-1165.11		14	4.43164	11.5249	-7.09325		5.89836	2.93511	2.96325		57.0993	20.2981	71.7495
15	20.27	77.23	-56.96		r15	-989.705	ts15	-989.672	p15	-989.799		15	20.8086	79.8089	-59.0003		0.53863	2.57895	2.04032		2.65728	3.33931	3.58202
16	34.22	55.4	-21.18		r16	-514.314	ts16	-514.261	p16	-514.357		16	33.2079	60.0557	-26.8478		1.01213	4.65568	5.66782		2.95773	8.40376	26.7602
17	21.48	35.47	-13.99		r17	-4992.74	ts17	-4992.7	p17	-4414.22		17	29.0202	33.5757	-4.5555		7.54016	1.89434	9.4345		35.1032	5.34069	67.4375
									PEt3	-578.53
18	25.34	36.05	-10.72		r18	-2716.73	ts18	-2716.68	p18	-2138.2		18	31.5586	33.2507	-1.69204		6.21863	2.79934	9.02796		24.5407	7.76515	84.2161
									PEt3	-578.53
19	12.27	35.81	-23.54		r19	-4991.49	ts19	-4991.47	p19	-4412.99		19	17.1574	33.9168	-16.7594		4.88738	1.8932	6.78058		39.8319	5.2868	28.8045
									PEt3	-578.53
20	13.36	37.72	-24.36		r20	-2715.47	ts20	-2715.45	p20	-2136.97		20	14.1774	33.5123	-19.3349		0.817444	4.20768	5.02513		6.11859	11.155	20.6286
									PEt3	-578.53
21	9.18	9.2	-0.02		r21	-711.68	ts21	-711.662	p21	-711.68		21	11.391	11.3916	-0.000684605		2.21096	2.19165	0.0193154		24.0846	23.8223	96.577
22	14.3	29.05	-14.75		r22	-962.092	ts22	-962.066	p22	-962.115		22	16.283	30.9332	-14.6502		1.983	1.88321	0.0997956		13.8671	6.48264	0.676581
23	30.71	21.19	9.52		r23	-1013.49	ts23	-1013.44	p23	-1013.48		23	30.0929	24.1647	5.92819		0.617095	2.97471	3.59181		2.00943	14.0383	37.7291
24	2.87	16.96	-14.1		r24	-2266.59	ts24	-2266.59	p24	-2266.62		24	1.66043	20.7337	-19.0733		1.20957	3.77372	4.97329		42.1454	22.2507	35.2716
25	2.66	12.01	-9.35		r25	-2192.83	ts25	-2192.83	p25	-2192.85		25	2.23239	15.8388	-13.6064		0.427606	3.82879	4.2564		16.0754	31.8801	45.523
26	25.39	0.19	25.2		r26	-1127.82	ts26	-1127.78	p26	-1127.78		26	23.6115	-0.0593098	23.6708		1.77847	0.24931	1.52916		7.00462	131.216	6.0681
27	13.76	2.39	11.37		r27	-1209.74	ts27	-1209.72	p27	-1209.72		27	14.8756	2.61299	12.2626		1.11556	0.222989	0.892572		8.10728	9.33009	7.85024
28	29.06	16.63	12.43		r28	-1655.59	ts28	-1655.54	p28	-1655.56		28	25.1467	11.1963	13.9504		3.91329	5.43369	1.5204		13.4663	32.674	12.2317
29	14.95	30.89	-15.93		r29	-1656.74	ts29	-1656.72	p29	-1656.77		29	8.51456	26.9926	-18.478		6.43544	3.89743	2.54802		43.0464	12.6171	15.9951
30	9.88	17.22	-7.34		r30_31	-1063.55	ts30	-1063.54	p30	-1063.57		30	10.9247	21.2388	-10.3142		1.04467	4.01884	2.97417		10.5735	23.3382	40.5201
31	3.25	13.34	-10.08		r30_r31	-1063.55	ts31	-1063.55	p31	-1063.56		31	5.29404	12.0278	-6.73381		2.04404	1.31216	3.34619		62.8934	9.83626	33.1964
32	19.16	64.57	-45.4		r32+	-998.303	ts32+	-998.264	p32+	-998.365		32	24.2267	63.0086	-38.782		5.06665	1.56138	6.61804		26.4439	2.41813	14.5772
33	1.26	7.83	-6.57		r33+	-273.01	ts33+	-273.007	p33+	-273.026		33	2.11898	12.1503	-10.0313		0.858977	4.32031	3.46134		68.1728	55.1764	52.684
34	29.15	2.91	26.24		r34	-861.955	ts34	-861.911	p34_r35	-861.919		34	27.4376	5.40833	22.0292		1.71243	2.49833	4.21076		5.87453	85.8534	16.0471
35	18.31	-1.41	19.72		p34_r35	-861.919	ts35	-861.9	p35	-821.462		35	12.5251	-4.00508	16.5302		5.78489	2.59508	3.18981		31.5942	184.048	16.1755
									CH4	-40.4307
																MAD	2.99766			%MARE	42.4946
																max	9.4345			max	1281.71
																SD	2.26044			SD	153.583

## Sheet: def2_SVP
MOBH35		(a) J. Phys. Chem. A 2019, 123, 3761-3781
		(b) J. Phys. Chem. A 2019, 123, 6379-6380			* reference values quoted from (b)
BASIS SET: def2-SVP
REFERENCE VALUES (kcal/mol)*					STRUCTURES & CALCULATED ENERGIES (wB97M-V/def2-SVP) in hartree								CALCULATED (wB97M-V/def2-SVP) in kcal/mol				ABSOLUTE DEVATION				ARE
REACTION	FWD Barrier	REV Barrier	Reaction Energy		REACTANT		TS		PRODUCT			REACTION	FWD Barrier	REV Barrier	Reaction Energy		FWD Barrier	REV Barrier	Reaction Energy		FWD Barrier	REV Barrier	Reaction Energy
1	26.03	15.4	10.63		r1+	-1860.25	ts1+	-1860.2	p1+	-1860.23		1	25.4748	14.9469	10.5279		0.555248	0.453117	0.102131		2.13311	2.94232	0.960784
2	5.58	22.11	-16.53		r2+	-1690.68	ts2+	-1690.67	p2+	-1690.71		2	5.46022	24.687	-19.2268		0.119783	2.57702	2.69681		2.14664	11.6555	16.3146
3	0.91	27.21	-26.3		r3	-1270.37	ts3	-1270.37	p3	-1270.43		3	0.910758	35.0125	-34.1017		0.000757505	7.80248	7.80172		0.0832423	28.675	29.6643
4	1.49	8.85	-7.37		r4	-1232.35	ts4	-1232.35	p4	-1232.37		4	0.215884	15.7397	-15.5238		1.27412	6.88971	8.15382		85.5111	77.8498	110.635
5	4.47	22.77	-18.29		r5	-2746.15	ts5	-2746.15	p5	-2746.18		5	2.47835	20.7329	-18.2546		1.99165	2.03706	0.0354115		44.5559	8.94625	0.193611
6	15.77	14.25	1.52		r6	-2598.26	ts6	-2598.24	p6_r7	-2598.25		6	12.9797	9.8369	3.14279		2.79031	4.4131	1.62279		17.6938	30.9691	106.762
7	27.94	18.47	9.47		p6_r7	-2598.25	ts7	-2598.21	p7	-2598.24		7	27.0522	18.0701	8.98214		0.887807	0.399949	0.487858		3.17755	2.1654	5.15162
8	37.28	35.82	1.46		r8	-2626.44	ts8	-2626.39	p8_r9	-2626.44		8	34.6933	28.9585	5.73478		2.58672	6.8615	4.27478		6.93862	19.1555	292.793
9	33	4.93	28.07		p8_r9	-2626.44	ts9	-2626.38	p9	-2626.38		9	35.9277	3.33928	32.5884		2.92768	1.59072	4.5184		8.87177	32.2661	16.0969
10	-5.28	7.67	-12.95		r10	-1143.67	ts10	-1143.67	p10	-1030.48		10	-3.96246	3.96507	-7.92753		1.31754	3.70493	5.02247		24.9534	48.3042	38.7836
									CO	-113.199
11	34.8	89.6	-54.8		r11	-1249.31	ts11	-1249.26	p11	-1249.4		11	35.3463	92.6344	-57.2881		0.546304	3.03438	2.48808		1.56984	3.38659	4.54029
12	-0.63	31.02	-31.65		r12	-1799.81	ts12	-1799.81	p12	-1799.86		12	4.88294	35.1143	-30.2313		5.51294	4.09427	1.41867		875.07	13.1988	4.48236
13	22.41	49.69	-27.28		r13	-1683.49	ts13	-1683.45	p13	-1683.53		13	24.1719	52.6251	-28.4532		1.76185	2.93508	1.17323		7.8619	5.90678	4.30068
14	10.33	14.46	-4.13		r14	-1165.16	ts14	-1165.15	p14	-1165.17		14	7.89145	11.0946	-3.20318		2.43855	3.36537	0.926818		23.6065	23.2736	22.4411
15	20.27	77.23	-56.96		r15	-989.736	ts15	-989.703	p15	-989.83		15	20.6304	79.856	-59.2256		0.360445	2.62603	2.26558		1.77822	3.40027	3.97749
16	34.22	55.4	-21.18		r16	-514.341	ts16	-514.288	p16	-514.383		16	33.2655	59.6458	-26.3803		0.954484	4.24584	5.20033		2.78926	7.66398	24.553
17	21.48	35.47	-13.99		r17	-4992.87	ts17	-4992.83	p17	-4414.32		17	27.5755	33.5243	-5.94882		6.0955	1.94568	8.04118		28.3776	5.48542	57.478
									PEt3	-578.565
18	25.34	36.05	-10.72		r18	-2716.86	ts18	-2716.81	p18	-2138.3		18	30.2109	33.2922	-3.08135		4.87089	2.75776	7.63865		19.2221	7.64982	71.256
									PEt3	-578.565
19	12.27	35.81	-23.54		r19	-4991.62	ts19	-4991.59	p19	-4413.08		19	16.0814	33.8698	-17.7885		3.81137	1.94017	5.75154		31.0625	5.41796	24.4331
									PEt3	-578.565
20	13.36	37.72	-24.36		r20	-2715.59	ts20	-2715.57	p20	-2137.06		20	13.4103	33.5824	-20.1721		0.0503069	4.13759	4.1879		0.376549	10.9692	17.1917
									PEt3	-578.565
21	9.18	9.2	-0.02		r21	-711.766	ts21	-711.749	p21	-711.766		21	10.6624	10.6632	-0.00081249		1.48241	1.46322	0.0191875		16.1482	15.9045	95.9375
22	14.3	29.05	-14.75		r22	-962.199	ts22	-962.174	p22	-962.224		22	15.5657	31.4114	-15.8458		1.26566	2.36144	1.09578		8.85079	8.1289	7.42903
23	30.71	21.19	9.52		r23	-1013.57	ts23	-1013.53	p23	-1013.56		23	30.4347	24.1228	6.31194		0.275258	2.9328	3.20806		0.896314	13.8405	33.6981
24	2.87	16.96	-14.1		r24	-2266.71	ts24	-2266.71	p24	-2266.74		24	1.99089	21.0263	-19.0355		0.87911	4.06635	4.93546		30.631	23.9761	35.0032
25	2.66	12.01	-9.35		r25	-2192.96	ts25	-2192.96	p25	-2192.98		25	2.35342	16.2004	-13.847		0.306576	4.19041	4.49698		11.5254	34.891	48.0961
26	25.39	0.19	25.2		r26	-1127.88	ts26	-1127.84	p26	-1127.84		26	25.7688	0.12818	25.6407		0.378838	0.0618204	0.440659		1.49208	32.5371	1.74865
27	13.76	2.39	11.37		r27	-1209.82	ts27	-1209.79	p27	-1209.8		27	14.6189	2.11836	12.5005		0.858855	0.271645	1.1305		6.24168	11.3659	9.94283
28	29.06	16.63	12.43		r28	-1655.69	ts28	-1655.64	p28	-1655.67		28	27.7108	15.4081	12.3027		1.34917	1.22189	0.12728		4.64272	7.34753	1.02398
29	14.95	30.89	-15.93		r29	-1656.85	ts29	-1656.83	p29	-1656.87		29	12.9717	28.5246	-15.5529		1.97831	2.36544	0.377125		13.2329	7.65761	2.36739
30	9.88	17.22	-7.34		r30_31	-1063.62	ts30	-1063.61	p30	-1063.64		30	8.8657	17.3274	-8.46166		1.0143	0.107358	1.12166		10.2662	0.623448	15.2814
31	3.25	13.34	-10.08		r30_r31	-1063.62	ts31	-1063.62	p31	-1063.63		31	4.04833	9.87977	-5.83144		0.798334	3.46023	4.24856		24.5641	25.9387	42.1484
32	19.16	64.57	-45.4		r32+	-998.337	ts32+	-998.299	p32+	-998.4		32	23.9527	63.4101	-39.4574		4.79273	1.15986	5.94259		25.0143	1.79629	13.0894
33	1.26	7.83	-6.57		r33+	-273.061	ts33+	-273.059	p33+	-273.078		33	1.21681	11.9757	-10.7589		0.0431906	4.14568	4.18887		3.42783	52.9461	63.7576
34	29.15	2.91	26.24		r34	-862	ts34	-861.959	p34_r35	-861.967		34	25.6408	4.48314	21.1577		3.50919	1.57314	5.08233		12.0384	54.0598	19.3687
35	18.31	-1.41	19.72		p34_r35	-861.967	ts35	-861.942	p35	-821.496		35	15.303	-3.57707	18.8801		3.007	2.16707	0.839929		16.4227	153.693	4.25927
									CH4	-40.441
																MAD	2.40007			%MARE	32.4983
																max	8.15382			max	875.07
																SD	2.03985			SD	91.0074

## Sheet: ma_def2_SVP
MOBH35		(a) J. Phys. Chem. A 2019, 123, 3761-3781
		(b) J. Phys. Chem. A 2019, 123, 6379-6380			* reference values quoted from (b)
BASIS SET: ma-def2-SVP
REFERENCE VALUES (kcal/mol)*					STRUCTURES & CALCULATED ENERGIES (wB97M-V/ma-def2-SVP) in hartree								CALCULATED (wB97M-V/ma-def2-SVP) in kcal/mol				ABSOLUTE DEVATION				ARE
REACTION	FWD Barrier	REV Barrier	Reaction Energy		REACTANT		TS		PRODUCT			REACTION	FWD Barrier	REV Barrier	Reaction Energy		FWD Barrier	REV Barrier	Reaction Energy		FWD Barrier	REV Barrier	Reaction Energy
1	26.03	15.4	10.63		r1+	-1860.27	ts1+	-1860.23	p1+	-1860.25		1	25.7123	14.9524	10.7599		0.317697	0.44757	0.129873		1.2205	2.9063	1.22176
2	5.58	22.11	-16.53		r2+	-1690.7	ts2+	-1690.69	p2+	-1690.73		2	5.73054	24.5111	-18.7806		0.150542	2.40111	2.25057		2.69788	10.8599	13.6151
3	0.91	27.21	-26.3		r3	-1270.4	ts3	-1270.4	p3	-1270.45		3	1.31942	33.2715	-31.9521		0.409422	6.06153	5.6521		44.9914	22.2768	21.4909
4	1.49	8.85	-7.37		r4	-1232.37	ts4	-1232.37	p4	-1232.39		4	0.900487	14.898	-13.9975		0.589513	6.048	6.62751		39.5646	68.339	89.9255
5	4.47	22.77	-18.29		r5	-2746.19	ts5	-2746.18	p5	-2746.21		5	2.63167	21.2074	-18.5757		1.83833	1.56262	0.285715		41.126	6.86262	1.56214
6	15.77	14.25	1.52		r6	-2598.29	ts6	-2598.26	p6_r7	-2598.28		6	13.8337	11.6627	2.17103		1.93626	2.58729	0.651032		12.2781	18.1564	42.831
7	27.94	18.47	9.47		p6_r7	-2598.28	ts7	-2598.24	p7	-2598.27		7	27.6283	17.6867	9.94164		0.311662	0.783303	0.47164		1.11547	4.24094	4.98036
8	37.28	35.82	1.46		r8	-2626.48	ts8	-2626.42	p8_r9	-2626.47		8	34.6315	29.194	5.43752		2.64846	6.62597	3.97752		7.10423	18.498	272.433
9	33	4.93	28.07		p8_r9	-2626.47	ts9	-2626.41	p9	-2626.42		9	36.3055	3.21412	33.0914		3.30549	1.71588	5.02137		10.0166	34.8049	17.8888
10	-5.28	7.67	-12.95		r10	-1143.7	ts10	-1143.7	p10	-1030.5		10	-3.26687	3.91953	-7.1864		2.01313	3.75047	5.7636		38.1275	48.8979	44.5066
									CO	-113.204
11	34.8	89.6	-54.8		r11	-1249.34	ts11	-1249.28	p11	-1249.43		11	36.2738	91.6545	-55.3807		1.47381	2.05448	0.580665		4.23509	2.29294	1.05961
12	-0.63	31.02	-31.65		r12	-1799.83	ts12	-1799.83	p12	-1799.88		12	4.65161	35.2705	-30.6189		5.28161	4.25054	1.03107		838.351	13.7026	3.25774
13	22.41	49.69	-27.28		r13	-1683.51	ts13	-1683.47	p13	-1683.56		13	23.7923	52.8406	-29.0483		1.38227	3.15061	1.76834		6.16809	6.34054	6.4822
14	10.33	14.46	-4.13		r14	-1165.19	ts14	-1165.18	p14	-1165.2		14	8.32834	12.7411	-4.41276		2.00166	1.7189	0.282763		19.3772	11.8873	6.84657
15	20.27	77.23	-56.96		r15	-989.744	ts15	-989.711	p15	-989.836		15	20.7899	78.7081	-57.9182		0.519867	1.47806	0.958193		2.56471	1.91384	1.68222
16	34.22	55.4	-21.18		r16	-514.348	ts16	-514.295	p16	-514.39		16	33.1736	59.1855	-26.0118		1.04639	3.78546	4.83185		3.05783	6.83296	22.8133
17	21.48	35.47	-13.99		r17	-4992.91	ts17	-4992.87	p17	-4414.35		17	25.4414	29.7299	-4.28852		3.96137	5.74011	9.70148		18.4421	16.183	69.3458
									PEt3	-578.573
18	25.34	36.05	-10.72		r18	-2716.89	ts18	-2716.85	p18	-2138.32		18	29.535	31.287	-1.75198		4.19502	4.763	8.96802		16.5549	13.2122	83.6569
									PEt3	-578.573
19	12.27	35.81	-23.54		r19	-4991.66	ts19	-4991.63	p19	-4413.11		19	13.8311	30.1495	-16.3183		1.56112	5.66054	7.22166		12.7231	15.8072	30.6783
									PEt3	-578.573
20	13.36	37.72	-24.36		r20	-2715.63	ts20	-2715.61	p20	-2137.09		20	12.8206	31.6611	-18.8405		0.539365	6.05887	5.5195		4.03717	16.0627	22.658
									PEt3	-578.573
21	9.18	9.2	-0.02		r21	-711.785	ts21	-711.769	p21	-711.785		21	10.402	10.4024	-0.000378083		1.22205	1.20243	0.0196219		13.3121	13.0699	98.1096
22	14.3	29.05	-14.75		r22	-962.224	ts22	-962.199	p22	-962.248		22	15.8037	30.9462	-15.1425		1.50369	1.89622	0.392533		10.5153	6.52745	2.66124
23	30.71	21.19	9.52		r23	-1013.6	ts23	-1013.55	p23	-1013.59		23	30.4464	24.5103	5.93606		0.263622	3.32032	3.58394		0.858423	15.6693	37.6464
24	2.87	16.96	-14.1		r24	-2266.75	ts24	-2266.75	p24	-2266.78		24	1.91925	21.0622	-19.1429		0.950755	4.10216	5.04291		33.1273	24.1873	35.7653
25	2.66	12.01	-9.35		r25	-2193	ts25	-2193	p25	-2193.02		25	2.46161	16.2225	-13.7609		0.198395	4.21249	4.41089		7.45844	35.0749	47.1753
26	25.39	0.19	25.2		r26	-1127.9	ts26	-1127.85	p26	-1127.86		26	25.5357	0.0644572	25.4713		0.145733	0.125543	0.271276		0.573979	66.0751	1.07649
27	13.76	2.39	11.37		r27	-1209.83	ts27	-1209.81	p27	-1209.82		27	13.6849	1.7513	11.9336		0.075127	0.638703	0.563576		0.545981	26.724	4.95669
28	29.06	16.63	12.43		r28	-1655.72	ts28	-1655.68	p28	-1655.7		28	27.4553	14.9669	12.4885		1.60466	1.66312	0.0584618		5.52188	10.0007	0.470329
29	14.95	30.89	-15.93		r29	-1656.89	ts29	-1656.87	p29	-1656.91		29	12.1212	27.1892	-15.068		2.82881	3.70084	0.862035		18.9218	11.9807	5.41139
30	9.88	17.22	-7.34		r30_31	-1063.64	ts30	-1063.63	p30	-1063.65		30	9.5474	17.3309	-7.78355		0.332604	0.110946	0.443549		3.36643	0.644283	6.04291
31	3.25	13.34	-10.08		r30_r31	-1063.64	ts31	-1063.63	p31	-1063.65		31	4.72958	9.79615	-5.06657		1.47958	3.54385	5.01343		45.5257	26.5656	49.7364
32	19.16	64.57	-45.4		r32+	-998.341	ts32+	-998.303	p32+	-998.403		32	23.6564	62.787	-39.1306		4.49638	1.783	6.26938		23.4675	2.76135	13.8092
33	1.26	7.83	-6.57		r33+	-273.067	ts33+	-273.065	p33+	-273.084		33	1.29054	11.8418	-10.5513		0.030535	4.01182	3.98128		2.42341	51.2365	60.5979
34	29.15	2.91	26.24		r34	-862.016	ts34	-861.976	p34_r35	-861.983		34	25.6309	4.59448	21.0364		3.51907	1.68448	5.20355		12.0723	57.8861	19.8306
35	18.31	-1.41	19.72		p34_r35	-861.983	ts35	-861.959	p35	-821.511		35	15.2328	-3.32053	18.5533		3.07721	1.91053	1.16668		16.8062	135.499	5.91621
									CH4	-40.4428
																MAD	2.34251			%MARE	31.3369
																max	9.70148			max	838.351
																SD	2.07677			SD	87.669

## Sheet: def2_SVPD
MOBH35		(a) J. Phys. Chem. A 2019, 123, 3761-3781
		(b) J. Phys. Chem. A 2019, 123, 6379-6380			* reference values quoted from (b)
BASIS SET: def2-SVPD
REFERENCE VALUES (kcal/mol)*					STRUCTURES & CALCULATED ENERGIES (wB97M-V/def2-SVPD) in hartree								CALCULATED (wB97M-V/def2-SVPD) in kcal/mol				ABSOLUTE DEVATION				ARE
REACTION	FWD Barrier	REV Barrier	Reaction Energy		REACTANT		TS		PRODUCT			REACTION	FWD Barrier	REV Barrier	Reaction Energy		FWD Barrier	REV Barrier	Reaction Energy		FWD Barrier	REV Barrier	Reaction Energy
1	26.03	15.4	10.63		r1+	-1860.31	ts1+	-1860.27	p1+	-1860.29		1	26.1047	14.6647	11.44		0.0747427	0.735293	0.810035		0.287141	4.77463	7.62028
2	5.58	22.11	-16.53		r2+	-1690.74	ts2+	-1690.73	p2+	-1690.77		2	6.15934	24.6117	-18.4523		0.579337	2.50166	1.92233		10.3824	11.3146	11.6293
3	0.91	27.21	-26.3		r3	-1270.41	ts3	-1270.41	p3	-1270.46		3	1.22612	33.8519	-32.6258		0.316121	6.64189	6.32577		34.7386	24.4097	24.0524
4	1.49	8.85	-7.37		r4	-1232.38	ts4	-1232.38	p4	-1232.41		4	0.49991	15.07	-14.5701		0.99009	6.21999	7.20008		66.449	70.2824	97.6945
5	4.47	22.77	-18.29		r5	-2746.24	ts5	-2746.23	p5	-2746.27		5	3.34488	21.7733	-18.4284		1.12512	0.996724	0.138396		25.1705	4.37735	0.756674
6	15.77	14.25	1.52		r6	-2598.32	ts6	-2598.29	p6_r7	-2598.31		6	13.769	12.2544	1.51453		2.00103	1.99555	0.005474		12.6888	14.0039	0.360131
7	27.94	18.47	9.47		p6_r7	-2598.31	ts7	-2598.27	p7	-2598.3		7	27.8677	17.6561	10.2116		0.0722566	0.813875	0.741618		0.258613	4.40647	7.83124
8	37.28	35.82	1.46		r8	-2626.52	ts8	-2626.47	p8_r9	-2626.51		8	35.4056	28.645	6.76067		1.87437	7.17503	5.30067		5.02781	20.0308	363.059
9	33	4.93	28.07		p8_r9	-2626.51	ts9	-2626.46	p9	-2626.46		9	35.6102	2.80322	32.807		2.61025	2.12678	4.73702		7.90984	43.1395	16.8758
10	-5.28	7.67	-12.95		r10	-1143.74	ts10	-1143.74	p10	-1030.54		10	-2.53931	3.80129	-6.34061		2.74069	3.86871	6.60939		51.9069	50.4395	51.0378
									CO	-113.207
11	34.8	89.6	-54.8		r11	-1249.37	ts11	-1249.31	p11	-1249.46		11	35.5668	90.2113	-54.6445		0.766763	0.611265	0.155498		2.20334	0.682215	0.283755
12	-0.63	31.02	-31.65		r12	-1799.86	ts12	-1799.86	p12	-1799.91		12	2.82424	32.2784	-29.4541		3.45424	1.25837	2.19587		548.292	4.05664	6.93797
13	22.41	49.69	-27.28		r13	-1683.54	ts13	-1683.5	p13	-1683.59		13	23.5443	51.9635	-28.4192		1.13428	2.27351	1.13922		5.06151	4.57538	4.17604
14	10.33	14.46	-4.13		r14	-1165.21	ts14	-1165.2	p14	-1165.22		14	7.88979	13.0417	-5.15195		2.44021	1.41826	1.02195		23.6225	9.80815	24.7445
15	20.27	77.23	-56.96		r15	-989.752	ts15	-989.72	p15	-989.847		15	20.3326	79.855	-59.5225		0.0625518	2.62501	2.56246		0.308593	3.39895	4.4987
16	34.22	55.4	-21.18		r16	-514.358	ts16	-514.306	p16	-514.4		16	32.8072	59.3669	-26.5597		1.41276	3.9669	5.37965		4.12845	7.16046	25.3997
17	21.48	35.47	-13.99		r17	-4992.97	ts17	-4992.93	p17	-4414.39		17	26.1615	24.4959	1.66567		4.68154	10.9741	15.6557		21.7949	30.9392	111.906
									PEt3	-578.584
18	25.34	36.05	-10.72		r18	-2716.95	ts18	-2716.91	p18	-2138.36		18	30.5472	26.0879	4.45928		5.20717	9.96211	15.1793		20.5492	27.6342	141.598
									PEt3	-578.584
19	12.27	35.81	-23.54		r19	-4991.71	ts19	-4991.69	p19	-4413.15		19	12.076	24.9604	-12.8844		0.193982	10.8496	10.6556		1.58094	30.2975	45.2658
									PEt3	-578.584
20	13.36	37.72	-24.36		r20	-2715.68	ts20	-2715.67	p20	-2137.12		20	10.9895	26.5059	-15.5165		2.37053	11.2141	8.84352		17.7435	29.7297	36.3035
									PEt3	-578.584
21	9.18	9.2	-0.02		r21	-711.813	ts21	-711.798	p21	-711.813		21	9.23586	9.23742	-0.00155605		0.0558594	0.0374155	0.0184439		0.60849	0.40669	92.2197
22	14.3	29.05	-14.75		r22	-962.263	ts22	-962.238	p22	-962.285		22	15.7065	29.4105	-13.7039		1.40654	0.360474	1.04607		9.83597	1.24087	7.092
23	30.71	21.19	9.52		r23	-1013.63	ts23	-1013.59	p23	-1013.63		23	29.9219	24.4417	5.48013		0.788125	3.25175	4.03987		2.56635	15.3457	42.4356
24	2.87	16.96	-14.1		r24	-2266.82	ts24	-2266.81	p24	-2266.85		24	1.65025	21.5061	-19.8558		1.21975	4.54606	5.75581		42.4999	26.8046	40.8213
25	2.66	12.01	-9.35		r25	-2193.07	ts25	-2193.07	p25	-2193.09		25	1.74163	16.8641	-15.1224		0.918369	4.85405	5.77242		34.5252	40.4168	61.7371
26	25.39	0.19	25.2		r26	-1127.92	ts26	-1127.87	p26	-1127.87		26	26.6284	0.137987	26.4904		1.23837	0.0520131	1.29039		4.87741	27.3753	5.12059
27	13.76	2.39	11.37		r27	-1209.86	ts27	-1209.84	p27	-1209.84		27	13.0964	1.8347	11.2617		0.663618	0.555305	0.108313		4.82281	23.2345	0.952623
28	29.06	16.63	12.43		r28	-1655.75	ts28	-1655.71	p28	-1655.73		28	27.5613	15.2309	12.3304		1.49869	1.39909	0.0996036		5.15724	8.41304	0.801316
29	14.95	30.89	-15.93		r29	-1656.92	ts29	-1656.9	p29	-1656.95		29	12.5271	27.7611	-15.234		2.4229	3.12886	0.695963		16.2067	10.129	4.36888
30	9.88	17.22	-7.34		r30_31	-1063.67	ts30	-1063.65	p30	-1063.68		30	9.55063	17.5837	-8.0331		0.329368	0.363733	0.693102		3.33369	2.11227	9.4428
31	3.25	13.34	-10.08		r30_r31	-1063.67	ts31	-1063.66	p31	-1063.68		31	3.92253	10.7211	-6.79853		0.672531	2.61894	3.28147		20.6932	19.6322	32.5542
32	19.16	64.57	-45.4		r32+	-998.351	ts32+	-998.315	p32+	-998.419		32	22.6294	65.6229	-42.9935		3.46937	1.05286	2.40651		18.1074	1.63058	5.30068
33	1.26	7.83	-6.57		r33+	-273.076	ts33+	-273.074	p33+	-273.093		33	1.20436	11.7738	-10.5695		0.055638	3.94383	3.99947		4.41571	50.3682	60.8747
34	29.15	2.91	26.24		r34	-862.036	ts34	-861.995	p34_r35	-862.002		34	25.7428	4.66332	21.0794		3.40724	1.75332	5.16056		11.6886	60.2517	19.6668
35	18.31	-1.41	19.72		p34_r35	-862.002	ts35	-861.978	p35	-821.529		35	15.6001	-3.46469	19.0648		2.70993	2.05469	0.655235		14.8003	145.723	3.32269
									CH4	-40.4434
																MAD	2.56952			%MARE	30.967
																max	15.6557			max	548.292
																SD	2.90983			SD	66.8997

## Sheet: def2_TZVP_F
MOBH35		(a) J. Phys. Chem. A 2019, 123, 3761-3781
		(b) J. Phys. Chem. A 2019, 123, 6379-6380			* reference values quoted from (b)
BASIS SET: def2-TZVP(-F)
REFERENCE VALUES (kcal/mol)*					STRUCTURES & CALCULATED ENERGIES (wB97M-V/def2-TZVP(-F)) in hartree							CALCULATED (wB97M-V/def2-TZVP(-F)) in kcal/mol					ABSOLUTE DEVATION				ARE
REACTION	FWD Barrier	REV Barrier	Reaction Energy		REACTANT		TS		PRODUCT			REACTION	FWD Barrier	REV Barrier	Reaction Energy		FWD Barrier	REV Barrier	Reaction Energy		FWD Barrier	REV Barrier	Reaction Energy
1	26.03	15.4	10.63		r1+	-1861.51	ts1+	-1861.46	p1+	-1861.49		1	27.6709	16.4079	11.263		1.64088	1.00792	0.632968		6.30382	6.54491	5.95454
2	5.58	22.11	-16.53		r2+	-1691.77	ts2+	-1691.76	p2+	-1691.8		2	7.11345	23.2218	-16.1084		1.53345	1.11184	0.421612		27.4812	5.02868	2.55058
3	0.91	27.21	-26.3		r3	-1270.95	ts3	-1270.95	p3	-1271		3	1.29841	31.1533	-29.8549		0.38841	3.94329	3.55488		42.6825	14.4921	13.5167
4	1.49	8.85	-7.37		r4	-1232.88	ts4	-1232.88	p4	-1232.9		4	0.928618	12.7333	-11.8047		0.561382	3.88327	4.43465		37.6767	43.8788	60.1717
5	4.47	22.77	-18.29		r5	-2747.56	ts5	-2747.55	p5	-2747.59		5	4.28714	22.4204	-18.1333		0.182862	0.349583	0.156721		4.09088	1.53528	0.856865
6	15.77	14.25	1.52		r6	-2599.38	ts6	-2599.36	p6_r7	-2599.38		6	14.4928	13.3402	1.15257		1.27724	0.90981	0.36743		8.09917	6.38463	24.173
7	27.94	18.47	9.47		p6_r7	-2599.38	ts7	-2599.33	p7	-2599.37		7	29.3256	20.2487	9.0769		1.38559	1.77869	0.3931		4.95918	9.63018	4.151
8	37.28	35.82	1.46		r8	-2628.06	ts8	-2628	p8_r9	-2628.05		8	33.1869	29.782	3.40492		4.09313	6.03805	1.94492		10.9794	16.8566	133.213
9	33	4.93	28.07		p8_r9	-2628.05	ts9	-2628	p9	-2628		9	33.4841	2.71782	30.7662		0.484069	2.21218	2.69625		1.46688	44.8718	9.60544
10	-5.28	7.67	-12.95		r10	-1144.76	ts10	-1144.77	p10	-1031.44		10	-5.00686	7.98174	-12.9886		0.273137	0.311735	0.0385987		5.17304	4.06435	0.298059
									CO	-113.336
11	34.8	89.6	-54.8		r11	-1250.6	ts11	-1250.55	p11	-1250.69		11	34.9341	90.5047	-55.5707		0.134072	0.904749	0.770677		0.385263	1.00976	1.40635
12	-0.63	31.02	-31.65		r12	-1801.01	ts12	-1801	p12	-1801.05		12	4.24564	33.0096	-28.7639		4.87564	1.98956	2.88608		773.911	6.4138	9.11873
13	22.41	49.69	-27.28		r13	-1684.72	ts13	-1684.68	p13	-1684.77		13	24.85	52.1095	-27.2595		2.43999	2.4195	0.0204994		10.888	4.86918	0.0751445
14	10.33	14.46	-4.13		r14	-1166.11	ts14	-1166.1	p14	-1166.12		14	8.00345	13.7031	-5.69966		2.32655	0.756886	1.56966		22.5222	5.23435	38.0063
15	20.27	77.23	-56.96		r15	-990.214	ts15	-990.182	p15	-990.311		15	20.2741	81.2887	-61.0146		0.00408528	4.05865	4.05457		0.0201543	5.25528	7.11827
16	34.22	55.4	-21.18		r16	-514.791	ts16	-514.74	p16	-514.832		16	32.3271	58.2316	-25.9045		1.89291	2.83158	4.7245		5.53159	5.11116	22.3064
17	21.48	35.47	-13.99		r17	-4994.94	ts17	-4994.9	p17	-4416		17	24.3057	31.7669	-7.46125		2.82567	3.70308	6.52875		13.1549	10.44	46.6673
									PEt3	-578.946
18	25.34	36.05	-10.72		r18	-2718.62	ts18	-2718.58	p18	-2139.68		18	29.5142	33.5708	-4.05666		4.17416	2.47918	6.66334		16.4726	6.87706	62.158
									PEt3	-578.946
19	12.27	35.81	-23.54		r19	-4993.68	ts19	-4993.66	p19	-4414.77		19	12.1858	32.1766	-19.9908		0.0841961	3.6334	3.5492		0.686195	10.1463	15.0773
									PEt3	-578.946
20	13.36	37.72	-24.36		r20	-2717.36	ts20	-2717.34	p20	-2138.45		20	12.3467	33.9806	-21.6339		1.01326	3.73939	2.72613		7.58425	9.91353	11.191
									PEt3	-578.946
21	9.18	9.2	-0.02		r21	-712.508	ts21	-712.494	p21	-712.508		21	8.88231	8.88606	-0.00375607		0.297694	0.313938	0.0162439		3.24285	3.41237	81.2197
22	14.3	29.05	-14.75		r22	-963.209	ts22	-963.183	p22	-963.23		22	16.1132	29.1206	-13.0074		1.8132	0.0705869	1.74261		12.6797	0.242984	11.8143
23	30.71	21.19	9.52		r23	-1014.62	ts23	-1014.56	p23	-1014.6		23	32.9633	24.1678	8.79549		2.25332	2.97782	0.724507		7.3374	14.053	7.61037
24	2.87	16.96	-14.1		r24	-2268.6	ts24	-2268.6	p24	-2268.63		24	2.41932	19.0652	-16.6459		0.450679	2.10521	2.54589		15.7031	12.4128	18.0559
25	2.66	12.01	-9.35		r25	-2194.78	ts25	-2194.78	p25	-2194.8		25	3.00991	14.4654	-11.4555		0.34991	2.45538	2.10547		13.1545	20.4445	22.5184
26	25.39	0.19	25.2		r26	-1128.55	ts26	-1128.51	p26	-1128.51		26	25.9862	0.226916	25.7593		0.596171	0.036916	0.559255		2.34805	19.4295	2.21927
27	13.76	2.39	11.37		r27	-1210.58	ts27	-1210.56	p27	-1210.56		27	13.45	2.34556	11.1044		0.31001	0.0444394	0.26557		2.25298	1.85939	2.33571
28	29.06	16.63	12.43		r28	-1656.89	ts28	-1656.85	p28	-1656.87		28	27.7414	15.8369	11.9045		1.31862	0.79308	0.525541		4.53758	4.76897	4.22801
29	14.95	30.89	-15.93		r29	-1658.06	ts29	-1658.04	p29	-1658.09		29	12.9694	29.7018	-16.7324		1.98061	1.18823	0.802372		13.2482	3.84666	5.03686
30	9.88	17.22	-7.34		r30_31	-1064.41	ts30	-1064.4	p30	-1064.43		30	9.4067	18.2079	-8.80121		0.473295	0.987917	1.46121		4.79044	5.73704	19.9075
31	3.25	13.34	-10.08		r30_r31	-1064.41	ts31	-1064.41	p31	-1064.43		31	3.65254	12.4062	-8.75364		0.402537	0.933821	1.32636		12.3858	7.00016	13.1583
32	19.16	64.57	-45.4		r32+	-998.797	ts32+	-998.762	p32+	-998.867		32	21.6483	65.725	-44.0767		2.48833	1.15503	1.3233		12.9871	1.7888	2.91475
33	1.26	7.83	-6.57		r33+	-273.256	ts33+	-273.254	p33+	-273.272		33	1.08616	10.7484	-9.66227		0.173842	2.91843	3.09227		13.7969	37.2724	47.0665
34	29.15	2.91	26.24		r34	-862.808	ts34	-862.764	p34_r35	-862.771		34	27.1578	4.30183	22.856		1.9922	1.39183	3.38403		6.83429	47.8292	12.8964
35	18.31	-1.41	19.72		p34_r35	-862.771	ts35	-862.746	p35	-822.252		35	15.6776	-2.51803	18.1957		2.63235	1.10803	1.52432		14.3766	78.5838	7.72982
									CH4	-40.4903
																MAD	1.67374			%MARE	22.3173
																max	6.66334			max	773.911
																SD	1.46669			SD	76.679

## Sheet: def2_TZVP
MOBH35		(a) J. Phys. Chem. A 2019, 123, 3761-3781
		(b) J. Phys. Chem. A 2019, 123, 6379-6380			* reference values quoted from (b)
BASIS SET: def2-TZVP
REFERENCE VALUES (kcal/mol)*					STRUCTURES & CALCULATED ENERGIES (wB97M-V/def2-TZVP) in hartree								CALCULATED (wB97M-V/def2-TZVP) in kcal/mol				ABSOLUTE DEVATION				ARE
REACTION	FWD Barrier	REV Barrier	Reaction Energy		REACTANT		TS		PRODUCT			REACTION	FWD Barrier	REV Barrier	Reaction Energy		FWD Barrier	REV Barrier	Reaction Energy		FWD Barrier	REV Barrier	Reaction Energy
1	26.03	15.4	10.63		r1+	-1861.53	ts1+	-1861.49	p1+	-1861.51		1	27.3993	16.4378	10.9615		1.36928	1.03776	0.331521		5.26039	6.73869	3.11873
2	5.58	22.11	-16.53		r2+	-1691.79	ts2+	-1691.78	p2+	-1691.81		2	7.20001	23.0227	-15.8226		1.62001	0.912657	0.707354		29.0325	4.1278	4.27922
3	0.91	27.21	-26.3		r3	-1270.96	ts3	-1270.96	p3	-1271.01		3	1.34368	31.0616	-29.718		0.433679	3.85164	3.41797		47.657	14.1553	12.9961
4	1.49	8.85	-7.37		r4	-1232.89	ts4	-1232.89	p4	-1232.91		4	0.968663	12.8019	-11.8333		0.521337	3.95192	4.46325		34.9891	44.6544	60.5598
5	4.47	22.77	-18.29		r5	-2747.58	ts5	-2747.57	p5	-2747.61		5	4.34273	22.0299	-17.6872		0.127268	0.740095	0.602827		2.84715	3.25031	3.29594
6	15.77	14.25	1.52		r6	-2599.4	ts6	-2599.38	p6_r7	-2599.4		6	14.6027	13.2169	1.38584		1.1673	1.03313	0.134164		7.40201	7.25006	8.82656
7	27.94	18.47	9.47		p6_r7	-2599.4	ts7	-2599.35	p7	-2599.38		7	29.2331	20.1789	9.05415		1.29307	1.70893	0.415852		4.62804	9.25244	4.39126
8	37.28	35.82	1.46		r8	-2628.09	ts8	-2628.04	p8_r9	-2628.08		8	33.4876	29.4621	4.0255		3.79237	6.35787	2.5655		10.1727	17.7495	175.719
9	33	4.93	28.07		p8_r9	-2628.08	ts9	-2628.03	p9	-2628.03		9	34.1365	2.69031	31.4462		1.13654	2.23969	3.37623		3.44407	45.4298	12.0279
10	-5.28	7.67	-12.95		r10	-1144.78	ts10	-1144.78	p10	-1031.46		10	-4.36941	7.43784	-11.8072		0.910588	0.232165	1.14275		17.246	3.02692	8.82435
									CO	-113.338
11	34.8	89.6	-54.8		r11	-1250.63	ts11	-1250.57	p11	-1250.72		11	35.6577	90.7483	-55.0907		0.857681	1.14834	0.290655		2.4646	1.28163	0.530392
12	-0.63	31.02	-31.65		r12	-1801.03	ts12	-1801.02	p12	-1801.07		12	4.52606	33.5159	-28.9899		5.15606	2.49594	2.66013		818.423	8.04622	8.40483
13	22.41	49.69	-27.28		r13	-1684.75	ts13	-1684.71	p13	-1684.79		13	24.4321	52.2972	-27.8651		2.0221	2.6072	0.585105		9.02319	5.24694	2.14481
14	10.33	14.46	-4.13		r14	-1166.13	ts14	-1166.12	p14	-1166.14		14	8.53541	13.686	-5.15059		1.79459	0.773991	1.02059		17.3726	5.35263	24.7117
15	20.27	77.23	-56.96		r15	-990.222	ts15	-990.19	p15	-990.32		15	19.9494	81.1563	-61.2069		0.32063	3.92626	4.24689		1.5818	5.08385	7.45591
16	34.22	55.4	-21.18		r16	-514.8	ts16	-514.748	p16	-514.841		16	32.3487	57.8325	-25.4839		1.87132	2.43253	4.30386		5.4685	4.39086	20.3204
17	21.48	35.47	-13.99		r17	-4994.97	ts17	-4994.93	p17	-4416.03		17	25.3885	32.1378	-6.74924		3.90852	3.33224	7.24076		18.1961	9.39452	51.7567
									PEt3	-578.95
18	25.34	36.05	-10.72		r18	-2718.65	ts18	-2718.61	p18	-2139.71		18	29.4923	33.6235	-4.13126		4.15226	2.42648	6.58874		16.3862	6.73088	61.4621
									PEt3	-578.95
19	12.27	35.81	-23.54		r19	-4993.71	ts19	-4993.69	p19	-4414.79		19	13.5044	32.5325	-19.0281		1.23436	3.27754	4.5119		10.06	9.15259	19.167
									PEt3	-578.95
20	13.36	37.72	-24.36		r20	-2717.39	ts20	-2717.37	p20	-2138.47		20	12.6351	34.0355	-21.4005		0.724948	3.68447	2.95952		5.42626	9.76794	12.1491
									PEt3	-578.95
21	9.18	9.2	-0.02		r21	-712.52	ts21	-712.505	p21	-712.52		21	8.93352	8.93717	-0.00365701		0.246485	0.262828	0.016343		2.68502	2.85682	81.7149
22	14.3	29.05	-14.75		r22	-963.226	ts22	-963.2	p22	-963.246		22	16.1002	28.9876	-12.8874		1.80022	0.0623717	1.86259		12.5889	0.214705	12.6277
23	30.71	21.19	9.52		r23	-1014.64	ts23	-1014.58	p23	-1014.62		23	33.0606	24.2134	8.84727		2.35064	3.02338	0.672733		7.65433	14.2679	7.06653
24	2.87	16.96	-14.1		r24	-2268.63	ts24	-2268.63	p24	-2268.66		24	2.92682	18.1423	-15.2155		0.0568168	1.18227	1.11546		1.97968	6.97095	7.91104
25	2.66	12.01	-9.35		r25	-2194.81	ts25	-2194.8	p25	-2194.83		25	3.55616	13.7836	-10.2274		0.896158	1.77356	0.877399		33.6902	14.7673	9.38394
26	25.39	0.19	25.2		r26	-1128.56	ts26	-1128.52	p26	-1128.52		26	25.9593	0.22423	25.7351		0.569319	0.03423	0.535089		2.2423	18.0158	2.12337
27	13.76	2.39	11.37		r27	-1210.59	ts27	-1210.57	p27	-1210.57		27	13.0407	2.61178	10.4289		0.719303	0.22178	0.941083		5.22749	9.27949	8.27689
28	29.06	16.63	12.43		r28	-1656.91	ts28	-1656.87	p28	-1656.9		28	27.9328	16.3282	11.6046		1.12724	0.301844	0.825392		3.879	1.81506	6.64032
29	14.95	30.89	-15.93		r29	-1658.09	ts29	-1658.07	p29	-1658.11		29	13.4709	29.9205	-16.4496		1.47914	0.96951	0.519635		9.89395	3.13859	3.26199
30	9.88	17.22	-7.34		r30_31	-1064.43	ts30	-1064.41	p30	-1064.44		30	9.25453	18.4233	-9.16873		0.625472	1.20326	1.82873		6.33069	6.98756	24.9146
31	3.25	13.34	-10.08		r30_r31	-1064.43	ts31	-1064.42	p31	-1064.44		31	3.96143	12.1051	-8.1437		0.711425	1.23488	1.9363		21.89	9.25695	19.2094
32	19.16	64.57	-45.4		r32+	-998.804	ts32+	-998.77	p32+	-998.875		32	21.3407	65.8326	-44.4919		2.18073	1.26265	0.908086		11.3817	1.95547	2.00019
33	1.26	7.83	-6.57		r33+	-273.257	ts33+	-273.255	p33+	-273.272		33	1.03643	10.7115	-9.67506		0.223573	2.88149	3.10506		17.7439	36.8006	47.2612
34	29.15	2.91	26.24		r34	-862.831	ts34	-862.787	p34_r35	-862.794		34	27.2344	4.27158	22.9628		1.91558	1.36158	3.27716		6.57146	46.7897	12.4892
35	18.31	-1.41	19.72		p34_r35	-862.794	ts35	-862.769	p35	-822.275		35	15.7156	-2.45642	18.1721		2.59436	1.04642	1.54794		14.1691	74.2143	7.84957
									CH4	-40.4904
																MAD	1.71677			%MARE	23.3076
																max	7.24076			max	818.423
																SD	1.45331			SD	81.4933

## Sheet: def2_TZVPP
MOBH35		(a) J. Phys. Chem. A 2019, 123, 3761-3781
		(b) J. Phys. Chem. A 2019, 123, 6379-6380			* reference values quoted from (b)
BASIS SET: def2-TZVPP
REFERENCE VALUES (kcal/mol)*					STRUCTURES & CALCULATED ENERGIES (wB97M-V/def2-TZVPP) in hartree								CALCULATED (wB97M-V/def2-TZVPP) in kcal/mol				ABSOLUTE DEVATION				%MARE
REACTION	FWD Barrier	REV Barrier	Reaction Energy		REACTANT		TS		PRODUCT			REACTION	FWD Barrier	REV Barrier	Reaction Energy		FWD Barrier	REV Barrier	Reaction Energy		FWD Barrier	REV Barrier	Reaction Energy
1	26.03	15.4	10.63		r1+	-1861.55	ts1+	-1861.5	p1+	-1861.53		1	27.3631	16.4383	10.9248		1.3331	1.03826	0.294835		5.12139	6.74196	2.77362
2	5.58	22.11	-16.53		r2+	-1691.81	ts2+	-1691.8	p2+	-1691.83		2	7.10412	22.8713	-15.7671		1.52412	0.761251	0.762867		27.3139	3.44302	4.61504
3	0.91	27.21	-26.3		r3	-1270.97	ts3	-1270.97	p3	-1271.02		3	1.33991	30.9699	-29.63		0.429907	3.75991	3.33		47.2426	13.8181	12.6616
4	1.49	8.85	-7.37		r4	-1232.9	ts4	-1232.9	p4	-1232.92		4	0.961735	12.7631	-11.8014		0.528265	3.91313	4.43139		35.454	44.2161	60.1275
5	4.47	22.77	-18.29		r5	-2747.6	ts5	-2747.59	p5	-2747.62		5	4.20078	22.1693	-17.9685		0.269222	0.600687	0.321465		6.02287	2.63806	1.7576
6	15.77	14.25	1.52		r6	-2599.41	ts6	-2599.39	p6_r7	-2599.41		6	15.0909	13.2426	1.84827		0.679108	1.00738	0.328267		4.30633	7.0693	21.5965
7	27.94	18.47	9.47		p6_r7	-2599.41	ts7	-2599.36	p7	-2599.39		7	29.2282	20.1548	9.07339		1.28822	1.68483	0.396609		4.61068	9.12199	4.18806
8	37.28	35.82	1.46		r8	-2628.11	ts8	-2628.05	p8_r9	-2628.1		8	33.6124	29.5215	4.09086		3.66764	6.2985	2.63086		9.83808	17.5838	180.196
9	33	4.93	28.07		p8_r9	-2628.1	ts9	-2628.05	p9	-2628.05		9	34.2296	2.698	31.5316		1.2296	2.232	3.4616		3.72605	45.2739	12.332
10	-5.28	7.67	-12.95		r10	-1144.8	ts10	-1144.8	p10	-1031.48		10	-4.48879	7.44022	-11.929		0.791212	0.229776	1.02099		14.9851	2.99578	7.88408
									CO	-113.338
11	34.8	89.6	-54.8		r11	-1250.65	ts11	-1250.59	p11	-1250.74		11	34.9794	91.176	-56.1966		0.179381	1.576	1.39662		0.515463	1.75893	2.54858
12	-0.63	31.02	-31.65		r12	-1801.05	ts12	-1801.04	p12	-1801.09		12	4.14932	33.8062	-29.6569		4.77932	2.78621	1.99311		758.623	8.98198	6.29736
13	22.41	49.69	-27.28		r13	-1684.76	ts13	-1684.72	p13	-1684.81		13	24.0992	52.4637	-28.3645		1.68923	2.77371	1.08448		7.53785	5.58203	3.97535
14	10.33	14.46	-4.13		r14	-1166.15	ts14	-1166.13	p14	-1166.15		14	9.00762	13.9493	-4.94169		1.32238	0.510692	0.811687		12.8013	3.53175	19.6534
15	20.27	77.23	-56.96		r15	-990.229	ts15	-990.197	p15	-990.327		15	19.8528	81.5969	-61.7441		0.417183	4.36687	4.78405		2.05813	5.65437	8.39897
16	34.22	55.4	-21.18		r16	-514.807	ts16	-514.756	p16	-514.847		16	32.2731	57.6685	-25.3954		1.9469	2.26851	4.21541		5.68936	4.09478	19.9028
17	21.48	35.47	-13.99		r17	-4994.99	ts17	-4994.96	p17	-4416.05		17	24.8297	32.2836	-7.45383		3.34973	3.18644	6.53617		15.5947	8.98347	46.7203
									PEt3	-578.957
18	25.34	36.05	-10.72		r18	-2718.68	ts18	-2718.63	p18	-2139.73		18	28.9943	33.8012	-4.80693		3.65426	2.24881	5.91307		14.4209	6.23804	55.1593
									PEt3	-578.957
19	12.27	35.81	-23.54		r19	-4993.74	ts19	-4993.72	p19	-4414.81		19	13.0513	32.6846	-19.6333		0.781286	3.12544	3.90672		6.36745	8.72784	16.5961
									PEt3	-578.957
20	13.36	37.72	-24.36		r20	-2717.41	ts20	-2717.39	p20	-2138.49		20	12.2932	34.2201	-21.9269		1.06682	3.49992	2.4331		7.98516	9.27868	9.98809
									PEt3	-578.957
21	9.18	9.2	-0.02		r21	-712.536	ts21	-712.522	p21	-712.536		21	9.01612	9.01981	-0.0036833		0.163878	0.180194	0.0163167		1.78516	1.95863	81.5835
22	14.3	29.05	-14.75		r22	-963.247	ts22	-963.221	p22	-963.268		22	15.9468	29.1334	-13.1866		1.64681	0.0834163	1.5634		11.5162	0.287147	10.5993
23	30.71	21.19	9.52		r23	-1014.65	ts23	-1014.6	p23	-1014.64		23	33.0141	24.183	8.83114		2.30409	2.99296	0.688864		7.50274	14.1244	7.23597
24	2.87	16.96	-14.1		r24	-2268.66	ts24	-2268.65	p24	-2268.68		24	2.98473	18.1626	-15.1778		0.114734	1.20258	1.07785		3.9977	7.09068	7.6443
25	2.66	12.01	-9.35		r25	-2194.84	ts25	-2194.83	p25	-2194.85		25	3.61133	13.7781	-10.1668		0.951326	1.76811	0.816784		35.7641	14.722	8.73565
26	25.39	0.19	25.2		r26	-1128.57	ts26	-1128.53	p26	-1128.53		26	26.1481	0.205675	25.9424		0.758106	0.0156752	0.742431		2.98585	8.25009	2.94616
27	13.76	2.39	11.37		r27	-1210.6	ts27	-1210.58	p27	-1210.59		27	13.0853	2.69377	10.3916		0.674673	0.303774	0.978447		4.90314	12.7102	8.60551
28	29.06	16.63	12.43		r28	-1656.93	ts28	-1656.89	p28	-1656.91		28	29.2646	17.1056	12.159		0.204562	0.475584	0.271022		0.703929	2.85979	2.18038
29	14.95	30.89	-15.93		r29	-1658.11	ts29	-1658.08	p29	-1658.13		29	14.4406	30.9102	-16.4696		0.509386	0.0202239	0.53961		3.40726	0.0654708	3.38738
30	9.88	17.22	-7.34		r30_31	-1064.44	ts30	-1064.43	p30	-1064.45		30	8.91164	17.9071	-8.99549		0.968358	0.687135	1.65549		9.8012	3.99033	22.5544
31	3.25	13.34	-10.08		r30_r31	-1064.44	ts31	-1064.43	p31	-1064.45		31	3.9949	11.5391	-7.54425		0.744895	1.80086	2.53575		22.9199	13.4997	25.1563
32	19.16	64.57	-45.4		r32+	-998.811	ts32+	-998.777	p32+	-998.882		32	21.0137	65.5645	-44.5508		1.85375	0.994546	0.8492		9.67508	1.54026	1.87048
33	1.26	7.83	-6.57		r33+	-273.266	ts33+	-273.265	p33+	-273.283		33	0.739858	11.0675	-10.3277		0.520142	3.23753	3.75767		41.2811	41.3478	57.1944
34	29.15	2.91	26.24		r34	-862.839	ts34	-862.797	p34_r35	-862.804		34	26.4846	4.42468	22.06		2.66536	1.51468	4.18004		9.14359	52.0509	15.93
35	18.31	-1.41	19.72		p34_r35	-862.804	ts35	-862.778	p35	-822.282		35	16.4566	-2.39252	18.8491		1.85338	0.982517	0.870867		10.1223	69.6821	4.41616
									CH4	-40.4923
																MAD	1.63176			%MARE	22.6957
																max	6.53617			max	758.623
																SD	1.41774			SD	76.0589

## Sheet: def2_TZVPPD
MOBH35		(a) J. Phys. Chem. A 2019, 123, 3761-3781					orange denotes use of "StrongSCF" criterion
		(b) J. Phys. Chem. A 2019, 123, 6379-6380			* reference values quoted from (b)
BASIS SET: def2-TZVPPD
REFERENCE VALUES (kcal/mol)*					STRUCTURES & CALCULATED ENERGIES (wB97M-V/def2-TZVPPD) in hartree								CALCULATED (wB97M-V/def2-TZVPPD) in kcal/mol				ABSOLUTE DEVATION				ARE
REACTION	FWD Barrier	REV Barrier	Reaction Energy		REACTANT		TS		PRODUCT			REACTION	FWD Barrier	REV Barrier	Reaction Energy		FWD Barrier	REV Barrier	Reaction Energy		FWD Barrier	REV Barrier	Reaction Energy
1	26.03	15.4	10.63		r1+	-1861.55	ts1+	-1861.51	p1+	-1861.53		1	27.4144	16.4417	10.9727		1.38439	1.04166	0.342732		5.31845	6.76403	3.22419
2	5.58	22.11	-16.53		r2+	-1691.81	ts2+	-1691.8	p2+	-1691.83		2	7.12727	22.8646	-15.7374		1.54727	0.754635	0.792635		27.7289	3.4131	4.79513
3	0.91	27.21	-26.3		r3	-1270.97	ts3	-1270.97	p3	-1271.02		3	1.33977	31.0071	-29.6673		0.429769	3.79708	3.36731		47.2273	13.9547	12.8035
4	1.49	8.85	-7.37		r4	-1232.9	ts4	-1232.9	p4	-1232.92		4	0.948623	12.7433	-11.7947		0.541377	3.89329	4.42466		36.334	43.992	60.0362
5	4.47	22.77	-18.29		r5	-2747.6	ts5	-2747.59	p5	-2747.63		5	4.28147	22.1245	-17.843		0.188526	0.645514	0.446988		4.21758	2.83493	2.44389
6	15.77	14.25	1.52		r6	-2599.41	ts6	-2599.39	p6_r7	-2599.41		6	15.1426	13.3745	1.76812		0.627351	0.875467	0.248116		3.97813	6.14363	16.3234
7	27.94	18.47	9.47		p6_r7	-2599.41	ts7	-2599.37	p7	-2599.4		7	29.1958	20.197	8.99876		1.2558	1.72704	0.471236		4.49465	9.35052	4.9761
8	37.28	35.82	1.46		r8	-2628.11	ts8	-2628.06	p8_r9	-2628.1		8	33.5808	29.4904	4.09041		3.69916	6.32957	2.63041		9.92263	17.6705	180.165
9	33	4.93	28.07		p8_r9	-2628.1	ts9	-2628.05	p9	-2628.05		9	34.3353	2.70834	31.6269		1.33527	2.22166	3.55693		4.04627	45.064	12.6716
10	-5.28	7.67	-12.95		r10	-1144.8	ts10	-1144.81	p10	-1031.48		10	-4.28072	7.32376	-11.6045		0.999284	0.346243	1.34553		18.9258	4.51424	10.3902
									CO	-113.339
11	34.8	89.6	-54.8		r11	-1250.65	ts11	-1250.59	p11	-1250.74		11	34.9907	91.021	-56.0303		0.190721	1.42098	1.23026		0.548047	1.58592	2.245
12	-0.63	31.02	-31.65		r12	-1801.05	ts12	-1801.04	p12	-1801.1		12	4.0767	33.703	-29.6263		4.7067	2.68298	2.02372		747.096	8.64921	6.39406
13	22.41	49.69	-27.28		r13	-1684.76	ts13	-1684.73	p13	-1684.81		13	24.0465	52.385	-28.3385		1.63652	2.69502	1.0585		7.30261	5.42366	3.88014
14	10.33	14.46	-4.13		r14	-1166.15	ts14	-1166.13	p14	-1166.16		14	8.91424	14.1428	-5.22856		1.41576	0.3172	1.09856		13.7053	2.19364	26.5996
15	20.27	77.23	-56.96		r15	-990.23	ts15	-990.198	p15	-990.328		15	19.8994	81.5308	-61.6315		0.370644	4.30084	4.67148		1.82853	5.56887	8.20134
16	34.22	55.4	-21.18		r16	-514.808	ts16	-514.757	p16	-514.849		16	32.2129	57.638	-25.4251		2.00705	2.23804	4.24509		5.86514	4.03979	20.0429
17	21.48	35.47	-13.99		r17	-4995	ts17	-4994.96	p17	-4416.05		17	24.0703	32.0262	-7.95591		2.59029	3.4438	6.03409		12.0591	9.70904	43.1314
									PEt3	-578.958
18	25.34	36.05	-10.72		r18	-2718.68	ts18	-2718.64	p18	-2139.73		18	28.7401	34.1016	-5.36153		3.40008	1.94839	5.35847		13.4178	5.40468	49.9857
									PEt3	-578.958
19	12.27	35.81	-23.54		r19	-4993.74	ts19	-4993.72	p19	-4414.82		19	12.4039	32.3169	-19.9129		0.133934	3.49315	3.62708		1.09156	9.75467	15.4082
									PEt3	-578.958
20	13.36	37.72	-24.36		r20	-2717.42	ts20	-2717.4	p20	-2138.49		20	11.9647	34.2456	-22.2808		1.39529	3.47444	2.07915		10.4438	9.21114	8.53511
									PEt3	-578.958
21	9.18	9.2	-0.02		r21	-712.538	ts21	-712.524	p21	-712.538		21	8.95643	8.96022	-0.0037896		0.223569	0.23978	0.0162104		2.4354	2.6063	81.052
22	14.3	29.05	-14.75		r22	-963.249	ts22	-963.224	p22	-963.27		22	15.8989	29.0345	-13.1355		1.59893	0.0155385	1.61447		11.1813	0.0534889	10.9455
23	30.71	21.19	9.52		r23	-1014.65	ts23	-1014.6	p23	-1014.64		23	32.9155	24.1876	8.7279		2.20545	2.99756	0.792101		7.18155	14.1461	8.32039
24	2.87	16.96	-14.1		r24	-2268.66	ts24	-2268.66	p24	-2268.69		24	2.9389	18.0491	-15.1102		0.0688996	1.08907	1.01017		2.40068	6.42143	7.16436
25	2.66	12.01	-9.35		r25	-2194.84	ts25	-2194.83	p25	-2194.86		25	3.66836	13.7201	-10.0517		1.00836	1.7101	0.701735		37.9083	14.2389	7.50519
26	25.39	0.19	25.2		r26	-1128.58	ts26	-1128.53	p26	-1128.53		26	26.1581	0.167575	25.9906		0.768145	0.0224246	0.79057		3.02539	11.8024	3.13718
27	13.76	2.39	11.37		r27	-1210.61	ts27	-1210.59	p27	-1210.59		27	12.9441	2.61541	10.3286		0.815948	0.22541	1.04136		5.92986	9.43136	9.15882
28	29.06	16.63	12.43		r28	-1656.94	ts28	-1656.89	p28	-1656.92		28	29.1287	16.7204	12.4083		0.0687166	0.0903727	0.0216562		0.236464	0.543432	0.174225
29	14.95	30.89	-15.93		r29	-1658.11	ts29	-1658.09	p29	-1658.14		29	13.9893	30.4865	-16.4973		0.960744	0.403462	0.567282		6.42638	1.30612	3.56109
30	9.88	17.22	-7.34		r30_31	-1064.44	ts30	-1064.43	p30	-1064.46		30	9.02794	17.9624	-8.93447		0.852059	0.742408	1.59447		8.62408	4.31131	21.723
31	3.25	13.34	-10.08		r30_r31	-1064.44	ts31	-1064.44	p31	-1064.45		31	4.11853	11.5523	-7.43377		0.86853	1.7877	2.64623		26.724	13.401	26.2523
32	19.16	64.57	-45.4		r32+	-998.812	ts32+	-998.778	p32+	-998.883		32	20.9363	65.6979	-44.7616		1.77635	1.12791	0.638441		9.27113	1.7468	1.40626
33	1.26	7.83	-6.57		r33+	-273.268	ts33+	-273.266	p33+	-273.284		33	0.794279	11.0196	-10.2253		0.465721	3.1896	3.65532		36.962	40.7356	55.6365
34	29.15	2.91	26.24		r34	-862.841	ts34	-862.799	p34_r35	-862.806		34	26.4343	4.45728	21.977		2.71567	1.54728	4.26295		9.31619	53.1713	16.246
35	18.31	-1.41	19.72		p34_r35	-862.806	ts35	-862.78	p35	-822.284		35	16.5561	-2.38908	18.9452		1.75388	0.979084	0.774798		9.57882	69.4386	3.929
									CH4	-40.4923
																MAD	1.6072			%MARE	22.4744
																max	6.32957			max	747.096
																SD	1.37976			SD	74.9626

## Sheet: def2_QZVPP
MOBH35		(a) J. Phys. Chem. A 2019, 123, 3761-3781
		(b) J. Phys. Chem. A 2019, 123, 6379-6380			* reference values quoted from (b)
BASIS SET: def2-QZVPP
REFERENCE VALUES (kcal/mol)*					STRUCTURES & CALCULATED ENERGIES (wB97M-V/def2-QZVPP) in hartree								CALCULATED (wB97M-V/def2-QZVPP) in kcal/mol				ABSOLUTE DEVATION				%ARE
REACTION	FWD Barrier	REV Barrier	Reaction Energy		REACTANT		TS		PRODUCT			REACTION	FWD Barrier	REV Barrier	Reaction Energy		FWD Barrier	REV Barrier	Reaction Energy		FWD Barrier	REV Barrier	Reaction Energy
1	26.03	15.4	10.63		r1+	-1861.62	ts1+	-1861.57	p1+	-1861.6		1	27.3548	16.5341	10.8208		1.32485	1.13409	0.190759		5.0897	7.36422	1.79453
2	5.58	22.11	-16.53		r2+	-1691.87	ts2+	-1691.86	p2+	-1691.89		2	7.11701	22.7572	-15.6402		1.53701	0.647183	0.889832		27.5451	2.9271	5.38313
3	0.91	27.21	-26.3		r3	-1271.01	ts3	-1271	p3	-1271.05		3	1.33005	31.1124	-29.7823		0.420048	3.90238	3.48233		46.1592	14.3417	13.2408
4	1.49	8.85	-7.37		r4	-1232.94	ts4	-1232.93	p4	-1232.95		4	0.927095	12.7994	-11.8723		0.562905	3.94944	4.50234		37.7789	44.6264	61.0901
5	4.47	22.77	-18.29		r5	-2747.68	ts5	-2747.68	p5	-2747.71		5	4.29995	21.9596	-17.6596		0.170053	0.810443	0.63039		3.80432	3.55926	3.44664
6	15.77	14.25	1.52		r6	-2599.49	ts6	-2599.47	p6_r7	-2599.49		6	15.1927	13.4857	1.70705		0.577262	0.764308	0.187046		3.66051	5.36356	12.3057
7	27.94	18.47	9.47		p6_r7	-2599.49	ts7	-2599.44	p7	-2599.47		7	29.1716	20.3119	8.85972		1.2316	1.84187	0.610276		4.408	9.97223	6.44431
8	37.28	35.82	1.46		r8	-2628.2	ts8	-2628.14	p8_r9	-2628.19		8	33.4583	29.4773	3.98101		3.82167	6.34268	2.52101		10.2513	17.7071	172.672
9	33	4.93	28.07		p8_r9	-2628.19	ts9	-2628.14	p9	-2628.14		9	34.3405	2.6748	31.6657		1.34052	2.2552	3.59572		4.06219	45.7443	12.8098
10	-5.28	7.67	-12.95		r10	-1144.85	ts10	-1144.86	p10	-1031.53		10	-4.44776	7.37616	-11.8239		0.83224	0.293836	1.12608		15.7621	3.83098	8.69557
									CO	-113.344
11	34.8	89.6	-54.8		r11	-1250.71	ts11	-1250.65	p11	-1250.79		11	35.0015	91.2105	-56.209		0.201479	1.61046	1.40898		0.578963	1.79739	2.57113
12	-0.63	31.02	-31.65		r12	-1801.12	ts12	-1801.11	p12	-1801.17		12	4.23812	33.6874	-29.4493		4.86812	2.66741	2.20071		772.717	8.59899	6.95327
13	22.41	49.69	-27.28		r13	-1684.83	ts13	-1684.79	p13	-1684.87		13	23.9791	52.5328	-28.5537		1.56908	2.8428	1.27372		7.00172	5.72107	4.66904
14	10.33	14.46	-4.13		r14	-1166.2	ts14	-1166.18	p14	-1166.2		14	8.95556	14.3201	-5.36455		1.37444	0.139888	1.23455		13.3053	0.967416	29.8924
15	20.27	77.23	-56.96		r15	-990.263	ts15	-990.231	p15	-990.362		15	19.8816	82.2496	-62.368		0.388411	5.01957	5.40798		1.91619	6.49951	9.49435
16	34.22	55.4	-21.18		r16	-514.83	ts16	-514.778	p16	-514.87		16	32.4504	57.4575	-25.0071		1.76961	2.05747	3.82707		5.17127	3.71384	18.0693
17	21.48	35.47	-13.99		r17	-4995.14	ts17	-4995.1	p17	-4416.18		17	24.4117	32.9979	-8.58615		2.93174	2.47211	5.40385		13.6487	6.96959	38.6265
									PEt3	-578.981
18	25.34	36.05	-10.72		r18	-2718.78	ts18	-2718.73	p18	-2139.81		18	28.8211	34.7615	-5.94031		3.48115	1.28855	4.77969		13.7378	3.57433	44.5867
									PEt3	-578.981
19	12.27	35.81	-23.54		r19	-4993.89	ts19	-4993.87	p19	-4414.94		19	13.0572	33.4012	-20.344		0.787219	2.40877	3.19599		6.4158	6.72654	13.5769
									PEt3	-578.981
20	13.36	37.72	-24.36		r20	-2717.51	ts20	-2717.49	p20	-2138.57		20	12.6915	35.1982	-22.5066		0.668478	2.52183	1.85336		5.00358	6.68567	7.60819
									PEt3	-578.981
21	9.18	9.2	-0.02		r21	-712.572	ts21	-712.558	p21	-712.572		21	8.92221	8.92578	-0.00357152		0.257791	0.27422	0.0164285		2.80818	2.98065	82.1424
22	14.3	29.05	-14.75		r22	-963.295	ts22	-963.27	p22	-963.316		22	16.0115	29.0761	-13.0647		1.71145	0.0261434	1.68531		11.9682	0.0899945	11.4258
23	30.71	21.19	9.52		r23	-1014.7	ts23	-1014.65	p23	-1014.68		23	32.978	24.2041	8.77394		2.26801	3.01407	0.746058		7.38526	14.224	7.83674
24	2.87	16.96	-14.1		r24	-2268.75	ts24	-2268.75	p24	-2268.78		24	3.07294	18.1432	-15.0703		0.202943	1.18322	0.970272		7.07118	6.9765	6.88136
25	2.66	12.01	-9.35		r25	-2194.93	ts25	-2194.92	p25	-2194.94		25	3.74781	13.7177	-9.96991		1.08781	1.70773	0.619914		40.8953	14.2192	6.6301
26	25.39	0.19	25.2		r26	-1128.62	ts26	-1128.57	p26	-1128.57		26	26.087	0.132322	25.9547		0.697014	0.0576785	0.754693		2.74523	30.3571	2.99481
27	13.76	2.39	11.37		r27	-1210.65	ts27	-1210.63	p27	-1210.63		27	12.8612	2.64465	10.2165		0.898849	0.254648	1.1535		6.53234	10.6547	10.1451
28	29.06	16.63	12.43		r28	-1657	ts28	-1656.95	p28	-1656.98		28	29.4639	16.9211	12.5428		0.403899	0.291065	0.112835		1.38988	1.75024	0.90776
29	14.95	30.89	-15.93		r29	-1658.17	ts29	-1658.15	p29	-1658.2		29	14.2272	30.7671	-16.5399		0.722773	0.122867	0.609906		4.8346	0.397757	3.82866
30	9.88	17.22	-7.34		r30_31	-1064.48	ts30	-1064.47	p30	-1064.5		30	8.94707	18.0545	-9.10744		0.93293	0.834509	1.76744		9.44261	4.84616	24.0796
31	3.25	13.34	-10.08		r30_r31	-1064.48	ts31	-1064.48	p31	-1064.49		31	4.2711	11.4806	-7.20946		1.0211	1.85944	2.87054		31.4184	13.9389	28.4776
32	19.16	64.57	-45.4		r32+	-998.843	ts32+	-998.81	p32+	-998.915		32	20.7958	65.8774	-45.0816		1.63578	1.30737	0.318407		8.53745	2.02473	0.701337
33	1.26	7.83	-6.57		r33+	-273.277	ts33+	-273.276	p33+	-273.294		33	0.697773	11.0694	-10.3717		0.562227	3.23944	3.80166		44.6212	41.3721	57.864
34	29.15	2.91	26.24		r34	-862.876	ts34	-862.834	p34_r35	-862.841		34	26.333	4.50959	21.8234		2.81697	1.59959	4.41656		9.66372	54.9687	16.8314
35	18.31	-1.41	19.72		p34_r35	-862.841	ts35	-862.815	p35	-822.316		35	16.7489	-2.29756	19.0464		1.56113	0.887559	0.673569		8.5261	62.9475	3.41567
									CH4	-40.4951
																MAD	1.59818			%MARE	22.8799
																max	6.34268			max	772.717
																SD	1.36569			SD	77.208
