# Supplementary material for: Accelerating computations of organometallic reaction energies through hybrid basis sets
Source: Royal Society of Chemistry journal article supplement (doi:10.1039/d3qi00136a), 2023-01-01
Supplement: d3qi00136a3.xlsx [file d3qi00136a3.xlsx]

## Sheet: README
Statistical parameters presented at the end of the spreadsheets include data for reactions 8 and 9. In the manuscript,
these reactions were excluded. For details, see computational methods

## Sheet: TZVP_F_QZVPP
MOBH35		(a) J. Phys. Chem. A 2019, 123, 3761-3781
		(b) J. Phys. Chem. A 2019, 123, 6379-6380			* reference values quoted from (b)
DFA: revDOD-PBEP86-D4			BASIS SET: def2-TZVPP/def2-QZVPP
REFERENCE VALUES (kcal/mol)*					STRUCTURES & CALCULATED ENERGIES (revDOD-PBEP86/def2-TZVPP/def2-QZVPP) in hartree							CALCULATED (revDOD-PBEP86/def2-TZVPP/def2-QZVPP) in kcal/mol					ABSOLUTE DEVATION				ARE
REACTION	FWD Barrier	REV Barrier	Reaction Energy		REACTANT		TS		PRODUCT			REACTION	FWD Barrier	REV Barrier	Reaction Energy		FWD Barrier	REV Barrier	Reaction Energy		FWD Barrier	REV Barrier	Reaction Energy
1	26.03	15.4	10.63		r1+	-1859.45	ts1+	-1859.41	p1+	-1859.43		1	26.1108	14.007	12.1037		0.0807598	1.39297	1.47373		0.310257	9.04529	13.8639
2	5.58	22.11	-16.53		r2+	-1690.01	ts2+	-1690	p2+	-1690.04		2	6.27041	22.9551	-16.6847		0.690414	0.845121	0.154706		12.373	3.82235	0.935912
3	0.91	27.21	-26.3		r3	-1270	ts3	-1270	p3	-1270.04		3	1.18233	26.1786	-24.9963		0.272331	1.03137	1.3037		29.9265	3.79041	4.95704
4	1.49	8.85	-7.37		r4	-1231.99	ts4	-1231.99	p4	-1232		4	2.31636	8.29196	-5.9756		0.826356	0.558044	1.3944		55.4601	6.30558	18.9199
5	4.47	22.77	-18.29		r5	-2745.29	ts5	-2745.28	p5	-2745.32		5	3.41296	26.5163	-23.1033		1.05704	3.74626	4.8133		23.6473	16.4526	26.3166
6	15.77	14.25	1.52		r6	-2597.52	ts6	-2597.5	p6_r7	-2597.52		6	15.7304	14.0864	1.64401		0.039562	0.163574	0.124012		0.250868	1.14788	8.15866
7	27.94	18.47	9.47		p6_r7	-2597.52	ts7	-2597.48	p7	-2597.51		7	26.0091	18.5422	7.4669		1.93091	0.072196	2.0031		6.9109	0.390882	21.1521
8	37.28	35.82	1.46		r8	-2625.52	ts8	-2625.46	p8_r9	-2625.52		8	38.6836	38.1686	0.515049		1.40362	2.34858	0.944951		3.76509	6.5566	64.7227
9	33	4.93	28.07		p8_r9	-2625.52	ts9	-2625.47	p9	-2625.49		9	30.284	13.0064	17.2776		2.71603	8.07638	10.7924		8.23038	163.821	38.4482
10	-5.28	7.67	-12.95		r10	-1143.27	ts10	-1143.28	p10	-1030.09		10	-2.82514	9.81746	-12.6426		2.45486	2.14746	0.307394		46.4935	27.9982	2.3737
									CO	-113.201
11	34.8	89.6	-54.8		r11	-1248.74	ts11	-1248.69	p11	-1248.83		11	34.6265	89.719	-55.0925		0.173504	0.119011	0.292515		0.498574	0.132825	0.533786
12	-0.63	31.02	-31.65		r12	-1799.02	ts12	-1799.03	p12	-1799.07		12	-1.2766	30.1891	-31.4657		0.646598	0.830908	0.18431		102.635	2.67862	0.582337
13	22.41	49.69	-27.28		r13	-1682.69	ts13	-1682.66	p13	-1682.74		13	20.7074	48.2503	-27.5428		1.70256	1.43974	0.262822		7.59733	2.89744	0.963425
14	10.33	14.46	-4.13		r14	-1164.75	ts14	-1164.73	p14	-1164.76		14	10.4871	14.4832	-3.99611		0.157063	0.0231778	0.133886		1.52046	0.160289	3.24178
15	20.27	77.23	-56.96		r15	-989.343	ts15	-989.31	p15	-989.427		15	20.5669	73.4024	-52.8355		0.296895	3.8276	4.1245		1.4647	4.95611	7.24104
16	34.22	55.4	-21.18		r16	-514.128	ts16	-514.073	p16	-514.16		16	34.796	54.4527	-19.6566		0.576012	0.947347	1.52336		1.68326	1.71001	7.19244
17	21.48	35.47	-13.99		r17	-4991.58	ts17	-4991.54	p17	-4413.26		17	23.237	31.4079	-8.17091		1.75695	4.06214	5.81909		8.17947	11.4523	41.5946
									PEt3	-578.326
18	25.34	36.05	-10.72		r18	-2715.56	ts18	-2715.52	p18	-2137.24		18	25.4544	31.3097	-5.85533		0.216722	4.7403	4.86467		0.855258	13.1492	45.3794
									PEt3	-578.326
19	12.27	35.81	-23.54		r19	-4990.32	ts19	-4990.3	p19	-4412.02		19	14.0005	31.8433	-17.8428		1.73049	3.96673	5.69722		14.1034	11.0772	24.2023
									PEt3	-578.326
20	13.36	37.72	-24.36		r20	-2714.3	ts20	-2714.28	p20	-2136		20	12.0525	31.6983	-19.6458		1.30751	6.02167	4.71417		9.78672	15.9641	19.3521
									PEt3	-578.326
21	9.18	9.2	-0.02		r21	-711.499	ts21	-711.484	p21	-711.499		21	9.16846	9.17079	-0.00233801		0.0115443	0.0292063	0.017662		0.125755	0.31746	88.31			0.133953	0.116751	0.0172012		0.122408	0.0875452	0.00046083
22	14.3	29.05	-14.75		r22	-961.82	ts22	-961.796	p22	-961.84		22	15.573	27.7269	-12.1539		1.27296	1.3231	2.59606		8.9018	4.55456	17.6004			0.576017	0.456566	1.03258		0.69694	0.866534	1.56347
23	30.71	21.19	9.52		r23	-1013.12	ts23	-1013.08	p23	-1013.11		23	29.7575	19.7383	10.0191		0.952511	1.45166	0.499149		3.10163	6.85068	5.24316			0.754965	1.24254	0.487573		0.197547	0.209122	0.0115755
24	2.87	16.96	-14.1		r24	-2265.64	ts24	-2265.64	p24	-2265.66		24	3.1793	16.2372	-13.0579		0.309302	0.72277	1.04207		10.7771	4.26162	7.39058			0.169014	1.73327	1.91229		0.140287	1.0105	0.870216
25	2.66	12.01	-9.35		r25	-2191.97	ts25	-2191.97	p25	-2191.99		25	2.94275	11.6467	-8.70392		0.282752	0.363327	0.646078		10.6298	3.0252	6.90993			0.728418	0.931495	1.65991		0.445666	0.568169	1.01384
26	25.39	0.19	25.2		r26	-1127.4	ts26	-1127.36	p26	-1127.36		26	25.0442	0.160283	24.8839		0.345769	0.0297171	0.316052		1.36183	15.6406	1.25418			1.49838	0.0161174	1.51449		1.15261	0.0135997	1.19844
27	13.76	2.39	11.37		r27	-1209.33	ts27	-1209.31	p27	-1209.31		27	14.0998	2.28536	11.8145		0.339809	0.104644	0.444454		2.46954	4.37842	3.909			0.425129	0.183386	0.608515		0.0853192	0.0787421	0.164061
28	29.06	16.63	12.43		r28	-1654.96	ts28	-1654.92	p28	-1654.94		28	28.8027	14.2495	14.5532		0.257286	2.38051	2.12322		0.885361	14.3145	17.0814			0.0351481	2.01128	1.97613		0.222138	0.369223	0.147085
29	14.95	30.89	-15.93		r29	-1656.14	ts29	-1656.11	p29	-1656.16		29	14.3229	30.5207	-16.1979		0.62715	0.36925	0.267899		4.19498	1.19537	1.68173			0.258501	0.494624	0.226123		0.368649	0.125373	0.0417765
30	9.88	17.22	-7.34		r30_31	-1063.11	ts30	-1063.09	p30	-1063.12		30	10.1712	17.5147	-7.34343		0.291244	0.294673	0.00342837		2.94782	1.71122	0.046708			0.291776	0.600002	0.308226		0.000531714	0.305329	0.304798
31	3.25	13.34	-10.08		r30_r31	-1063.11	ts31	-1063.1	p31	-1063.12		31	3.34155	12.2361	-8.89455		0.0915499	1.1039	1.18545		2.81692	8.27512	11.7604			0.524963	1.22857	1.74353		0.433413	0.124667	0.55808
32	19.16	64.57	-45.4		r32+	-997.851	ts32+	-997.817	p32+	-997.917		32	20.8905	62.8375	-41.947		1.73046	1.73254	3.453		9.03163	2.6832	7.60573			1.65746	1.04213	2.68959		0.072999	0.690411	0.76341
33	1.26	7.83	-6.57		r33+	-272.965	ts33+	-272.962	p33+	-272.974		33	1.37467	7.22728	-5.85261		0.114669	0.602717	0.717386		9.1007	7.69753	10.9191			0.134713	0.414391	0.549104		0.0200444	0.188326	0.168282
34	29.15	2.91	26.24		r34	-861.551	ts34	-861.504	p34_r35	-861.509		34	29.9321	3.05291	26.8792		0.78213	0.142905	0.639225		2.68312	4.91084	2.43607			0.352142	0.365035	0.0128936		0.429989	0.22213	0.626331
35	18.31	-1.41	19.72		p34_r35	-861.509	ts35	-861.481	p35	-821.017		35	17.5602	-3.29423	20.8544		0.749797	1.88423	1.13444		4.09501	133.634	5.75272			0.569321	0.460387	0.108934		0.180476	1.42385	1.0255
									CH4	-40.4581
																MAD	1.295			%MARE	13.941
																max	10.7924			max	163.821
																SD	1.65171			SD	25.325

## Sheet: TZVP_QZVPP
MOBH35		(a) J. Phys. Chem. A 2019, 123, 3761-3781
		(b) J. Phys. Chem. A 2019, 123, 6379-6380			* reference values quoted from (b)
DFA: revDOD-PBEP86-D4			BASIS SET: def2-TZVP/def2-QZVPP
REFERENCE VALUES (kcal/mol)*					STRUCTURES & CALCULATED ENERGIES (revDOD-PBEP86/def2-TZVP/def2-QZVPP) in hartree							CALCULATED (revDOD-PBEP86/def2-TZVPP/def2-QZVP) in kcal/mol					ABSOLUTE DEVATION				ARE
REACTION	FWD Barrier	REV Barrier	Reaction Energy		REACTANT		TS		PRODUCT			REACTION	FWD Barrier	REV Barrier	Reaction Energy		FWD Barrier	REV Barrier	Reaction Energy		FWD Barrier	REV Barrier	Reaction Energy
1	26.03	15.4	10.63		r1+	-1859.6	ts1+	-1859.56	p1+	-1859.58		1	26.1664	14.195	11.9714		0.136404	1.20501	1.34141		0.524027	7.82473	12.6191
2	5.58	22.11	-16.53		r2+	-1690.13	ts2+	-1690.12	p2+	-1690.16		2	6.20487	22.9389	-16.734		0.624865	0.828871	0.204006		11.1983	3.74885	1.23416
3	0.91	27.21	-26.3		r3	-1270.04	ts3	-1270.04	p3	-1270.08		3	1.19584	26.1443	-24.9485		0.285845	1.06569	1.35153		31.4115	3.91654	5.13891
4	1.49	8.85	-7.37		r4	-1232.03	ts4	-1232.03	p4	-1232.04		4	2.33592	8.29479	-5.95888		0.845916	0.555206	1.41112		56.7729	6.27352	19.1468
5	4.47	22.77	-18.29		r5	-2745.43	ts5	-2745.43	p5	-2745.47		5	3.62061	26.8086	-23.188		0.849389	4.03857	4.89796		19.002	17.7364	26.7794
6	15.77	14.25	1.52		r6	-2597.6	ts6	-2597.57	p6_r7	-2597.6		6	15.8674	14.2617	1.6057		0.0974499	0.0117464	0.0857035		0.617945	0.0824307	5.63839
7	27.94	18.47	9.47		p6_r7	-2597.6	ts7	-2597.56	p7	-2597.58		7	25.9792	17.9925	7.98669		1.96078	0.477475	1.48331		7.01784	2.58514	15.6632
8	37.28	35.82	1.46		r8	-2625.7	ts8	-2625.64	p8_r9	-2625.7		8	38.533	38.0771	0.455874		1.25302	2.25714	1.00413		3.3611	6.30135	68.7758
9	33	4.93	28.07		p8_r9	-2625.7	ts9	-2625.66	p9	-2625.68		9	30.6303	12.9347	17.6956		2.3697	8.00469	10.3744		7.18089	162.367	36.959
10	-5.28	7.67	-12.95		r10	-1143.38	ts10	-1143.38	p10	-1030.2		10	-2.83337	9.88446	-12.7178		2.44663	2.21446	0.232177		46.3377	28.8716	1.79287
									CO	-113.201
11	34.8	89.6	-54.8		r11	-1248.91	ts11	-1248.85	p11	-1248.99		11	34.8166	89.8106	-54.994		0.0166035	0.210633	0.19403		0.0477112	0.235082	0.354069
12	-0.63	31.02	-31.65		r12	-1799.15	ts12	-1799.15	p12	-1799.2		12	-1.01309	30.4565	-31.4696		0.383094	0.563528	0.180434		60.8086	1.81666	0.570092
13	22.41	49.69	-27.28		r13	-1682.84	ts13	-1682.81	p13	-1682.89		13	20.2342	48.736	-28.5018		2.17576	0.953955	1.22181		9.70888	1.91981	4.47876
14	10.33	14.46	-4.13		r14	-1164.84	ts14	-1164.82	p14	-1164.84		14	10.5205	14.4789	-3.95843		0.190462	0.0188954	0.171567		1.84378	0.130674	4.15416
15	20.27	77.23	-56.96		r15	-989.377	ts15	-989.344	p15	-989.462		15	20.4906	73.8313	-53.3407		0.220605	3.39867	3.61927		1.08833	4.40071	6.35406
16	34.22	55.4	-21.18		r16	-514.178	ts16	-514.122	p16	-514.209		16	34.8242	54.4698	-19.6456		0.604189	0.930175	1.53436		1.7656	1.67902	7.2444
17	21.48	35.47	-13.99		r17	-4991.74	ts17	-4991.71	p17	-4413.4		17	23.1614	31.7814	-8.62		1.68136	3.68864	5.37		7.82756	10.3993	38.3845
									PEt3	-578.358
18	25.34	36.05	-10.72		r18	-2715.73	ts18	-2715.69	p18	-2137.38		18	25.3109	31.71	-6.39915		0.216722	4.33997	4.32085		0.855258	12.0387	40.3064
									PEt3	-578.358
19	12.27	35.81	-23.54		r19	-4990.49	ts19	-4990.46	p19	-4412.16		19	14.1503	32.2092	-18.0589		1.88033	3.60079	5.48112		15.3246	10.0553	23.2843
									PEt3	-578.358
20	13.36	37.72	-24.36		r20	-2714.46	ts20	-2714.44	p20	-2136.14		20	12.2108	32.0859	-19.875		1.14916	5.63414	4.48498		8.60152	14.9367	18.4112
									PEt3	-578.358
21	9.18	9.2	-0.02		r21	-711.581	ts21	-711.566	p21	-711.581		21	9.29218	9.29437	-0.00219094		0.112184	0.0943748	0.0178091		1.22205	1.02581	89.0453
22	14.3	29.05	-14.75		r22	-961.931	ts22	-961.907	p22	-961.953		22	15.0486	28.4335	-13.385		0.748558	0.616463	1.36502		5.23467	2.12207	9.25438
23	30.71	21.19	9.52		r23	-1013.25	ts23	-1013.2	p23	-1013.23		23	29.7656	19.6985	10.067		0.944413	1.49145	0.547037		3.07526	7.03846	5.74619
24	2.87	16.96	-14.1		r24	-2265.87	ts24	-2265.86	p24	-2265.89		24	2.88493	15.5519	-12.667		0.0149256	1.40808	1.433		0.520054	8.30235	10.1632
25	2.66	12.01	-9.35		r25	-2192.18	ts25	-2192.17	p25	-2192.19		25	3.0335	11.4131	-8.37962		0.373503	0.596874	0.970377		14.0414	4.96981	10.3784
26	25.39	0.19	25.2		r26	-1127.47	ts26	-1127.43	p26	-1127.43		26	24.8366	0.165665	24.671		0.553381	0.024335	0.529046		2.17952	12.8079	2.09939
27	13.76	2.39	11.37		r27	-1209.4	ts27	-1209.38	p27	-1209.38		27	14.0743	2.21925	11.855		0.314282	0.170752	0.485034		2.28402	7.14444	4.26591
28	29.06	16.63	12.43		r28	-1655.08	ts28	-1655.04	p28	-1655.06		28	28.8373	14.4331	14.4042		0.222693	2.19687	1.97418		0.766322	13.2103	15.8824
29	14.95	30.89	-15.93		r29	-1656.26	ts29	-1656.23	p29	-1656.28		29	14.495	30.4964	-16.0014		0.454988	0.393607	0.071381		3.0434	1.27422	0.448092
30	9.88	17.22	-7.34		r30_31	-1063.2	ts30	-1063.18	p30	-1063.21		30	10.1053	17.661	-7.55569		0.225269	0.440955	0.215687		2.28005	2.56072	2.93851
31	3.25	13.34	-10.08		r30_r31	-1063.2	ts31	-1063.19	p31	-1063.21		31	3.41664	12.2111	-8.79442		0.166639	1.12894	1.28558		5.12735	8.46285	12.7538
32	19.16	64.57	-45.4		r32+	-997.884	ts32+	-997.851	p32+	-997.952		32	20.7075	63.2338	-42.5263		1.54754	1.33617	2.87371		8.07693	2.06933	6.32975
33	1.26	7.83	-6.57		r33+	-272.98	ts33+	-272.978	p33+	-272.989		33	1.36328	7.25259	-5.88931		0.103281	0.577412	0.680692		8.19687	7.37435	10.3606
34	29.15	2.91	26.24		r34	-861.662	ts34	-861.615	p34_r35	-861.62		34	29.8402	3.11026	26.7299		0.690211	0.200263	0.489948		2.36779	6.88189	1.86718
35	18.31	-1.41	19.72		p34_r35	-861.62	ts35	-861.592	p35	-821.129		35	17.5471	-3.08059	20.6277		0.762873	1.67059	0.907714		4.16643	118.481	4.60301
									CH4	-40.4581
																MAD	1.23144			%MARE	13.1271
																max	10.3744			max	162.367
																SD	1.56646			SD	23.4451

## Sheet: TZVPP_QZVPP
MOBH35		(a) J. Phys. Chem. A 2019, 123, 3761-3781
		(b) J. Phys. Chem. A 2019, 123, 6379-6380			* reference values quoted from (b)
DFA: revDOD-PBEP86-D4			BASIS SET: def2-TZVPP/def2-QZVPP
REFERENCE VALUES (kcal/mol)*					STRUCTURES & CALCULATED ENERGIES (revDOD-PBEP86/def2-TZVPP/def2-QZVPP) in hartree							CALCULATED (revDOD-PBEP86/def2-TZVPP/def2-QZVPP) in kcal/mol					ABSOLUTE DEVATION				ARE
REACTION	FWD Barrier	REV Barrier	Reaction Energy		REACTANT		TS		PRODUCT			REACTION	FWD Barrier	REV Barrier	Reaction Energy		FWD Barrier	REV Barrier	Reaction Energy		FWD Barrier	REV Barrier	Reaction Energy
1	26.03	15.4	10.63		r1+	-1859.67	ts1+	-1859.62	p1+	-1859.65		1	26.2154	15.1549	11.0604		0.185351	0.24509	0.43044		0.712066	1.59149	4.0493
2	5.58	22.11	-16.53		r2+	-1690.19	ts2+	-1690.18	p2+	-1690.22		2	6.3154	22.8877	-16.5723		0.735403	0.777663	0.0422603		13.1793	3.51725	0.255658
3	0.91	27.21	-26.3		r3	-1270.06	ts3	-1270.06	p3	-1270.1		3	1.20426	26.2086	-25.0043		0.294265	1.00144	1.2957		32.3368	3.6804	4.92662
4	1.49	8.85	-7.37		r4	-1232.05	ts4	-1232.05	p4	-1232.06		4	2.33368	8.29625	-5.96257		0.843681	0.553747	1.40743		56.6229	6.25703	19.0967
5	4.47	22.77	-18.29		r5	-2745.5	ts5	-2745.5	p5	-2745.54		5	3.71369	26.8325	-23.1188		0.75631	4.06253	4.82884		16.9197	17.8416	26.4015
6	15.77	14.25	1.52		r6	-2597.63	ts6	-2597.61	p6_r7	-2597.63		6	15.9093	14.3231	1.58615		0.139296	0.0731481	0.0661479		0.883297	0.51332	4.35183
7	27.94	18.47	9.47		p6_r7	-2597.63	ts7	-2597.59	p7	-2597.62		7	26.0107	18.2224	7.78833		1.92929	0.247619	1.68167		6.90512	1.34066	17.7579
8	37.28	35.82	1.46		r8	-2625.76	ts8	-2625.7	p8_r9	-2625.76		8	38.535	38.1243	0.410617		1.25496	2.30435	1.04938		3.36632	6.43313	71.8755
9	33	4.93	28.07		p8_r9	-2625.76	ts9	-2625.72	p9	-2625.74		9	30.6076	12.9325	17.6751		2.39236	8.00252	10.3949		7.24957	162.323	37.032
10	-5.28	7.67	-12.95		r10	-1143.44	ts10	-1143.45	p10	-1030.26		10	-2.90757	9.99648	-12.9041		2.37243	2.32648	0.0459473		44.9323	30.3322	0.354805
									CO	-113.201
11	34.8	89.6	-54.8		r11	-1248.95	ts11	-1248.9	p11	-1249.04		11	34.9126	89.8511	-54.9385		0.112594	0.251079	0.138485		0.323547	0.280222	0.252709
12	-0.63	31.02	-31.65		r12	-1799.21	ts12	-1799.22	p12	-1799.26		12	-1.03265	30.4381	-31.4707		0.402646	0.581945	0.179299		63.912	1.87603	0.566505
13	22.41	49.69	-27.28		r13	-1682.89	ts13	-1682.86	p13	-1682.93		13	20.3644	48.521	-28.1565		2.04557	1.16905	0.876523		9.12793	2.35268	3.21306
14	10.33	14.46	-4.13		r14	-1164.88	ts14	-1164.86	p14	-1164.88		14	10.5263	14.505	-3.97873		0.196319	0.0450492	0.15127		1.90048	0.311544	3.66271
15	20.27	77.23	-56.96		r15	-989.399	ts15	-989.366	p15	-989.484		15	20.5437	73.7973	-53.2537		0.273655	3.43267	3.70632		1.35005	4.44473	6.50688
16	34.22	55.4	-21.18		r16	-514.195	ts16	-514.139	p16	-514.226		16	34.8798	54.4274	-19.5476		0.659767	0.972645	1.63241		1.92802	1.75568	7.70733
17	21.48	35.47	-13.99		r17	-4991.84	ts17	-4991.81	p17	-4413.47		17	23.1973	31.7489	-8.55159		1.71733	3.72108	5.43841		7.99501	10.4908	38.8735
									PEt3	-578.386
18	25.34	36.05	-10.72		r18	-2715.83	ts18	-2715.79	p18	-2137.45		18	25.429	31.7075	-6.27842		0.216722	4.34255	4.44158		0.855258	12.0459	41.4327
									PEt3	-578.386
19	12.27	35.81	-23.54		r19	-4990.58	ts19	-4990.56	p19	-4412.23		19	14.0168	32.1769	-18.1601		1.74681	3.63311	5.37992		14.2364	10.1455	22.8544
									PEt3	-578.386
20	13.36	37.72	-24.36		r20	-2714.56	ts20	-2714.54	p20	-2136.21		20	12.1148	32.091	-19.9762		1.24519	5.629	4.38382		9.32025	14.9231	17.996
									PEt3	-578.386
21	9.18	9.2	-0.02		r21	-711.633	ts21	-711.619	p21	-711.633		21	9.25448	9.25734	-0.00285115		0.0744843	0.0573354	0.0171489		0.811376	0.623211	85.7443			0.133953	0.116751	0.0172012		0.0594684	0.059416	5.23105e-05
22	14.3	29.05	-14.75		r22	-962	ts22	-961.976	p22	-962.021		22	15.0331	28.2822	-13.249		0.733131	0.767828	1.50096		5.12679	2.64312	10.176			0.576017	0.456566	1.03258		0.157113	0.311262	0.468375
23	30.71	21.19	9.52		r23	-1013.3	ts23	-1013.25	p23	-1013.28		23	29.8059	19.7763	10.0296		0.904141	1.41375	0.509606		2.94413	6.67176	5.353			0.754965	1.24254	0.487573		0.149176	0.171209	0.0220328
24	2.87	16.96	-14.1		r24	-2265.96	ts24	-2265.95	p24	-2265.98		24	2.95177	15.4831	-12.5313		0.0817747	1.47689	1.56866		2.84929	8.70807	11.1253			0.169014	1.73327	1.91229		0.0872395	0.256385	0.343625
25	2.66	12.01	-9.35		r25	-2192.27	ts25	-2192.27	p25	-2192.29		25	3.19288	11.3087	-8.11581		0.532884	0.701302	1.23419		20.0332	5.83932	13.1998			0.728418	0.931495	1.65991		0.195534	0.230194	0.425728
26	25.39	0.19	25.2		r26	-1127.51	ts26	-1127.47	p26	-1127.47		26	24.4927	0.18163	24.3111		0.897273	0.00836991	0.888903		3.53396	4.40522	3.52739			1.49838	0.0161174	1.51449		0.601104	0.00774748	0.625591
27	13.76	2.39	11.37		r27	-1209.45	ts27	-1209.42	p27	-1209.43		27	14.0102	2.19668	11.8135		0.250228	0.193316	0.443544		1.81851	8.08855	3.901			0.425129	0.183386	0.608515		0.174901	0.00993002	0.164971
28	29.06	16.63	12.43		r28	-1655.13	ts28	-1655.08	p28	-1655.11		28	28.8842	14.3993	14.485		0.17576	2.23072	2.05496		0.604817	13.4138	16.5322			0.0351481	2.01128	1.97613		0.140612	0.219433	0.0788215
29	14.95	30.89	-15.93		r29	-1656.31	ts29	-1656.28	p29	-1656.33		29	14.5086	30.3979	-15.8893		0.441357	0.492059	0.0407022		2.95222	1.59294	0.255506			0.258501	0.494624	0.226123		0.182856	0.00256437	0.185421
30	9.88	17.22	-7.34		r30_31	-1063.24	ts30	-1063.22	p30	-1063.25		30	10.2128	17.5818	-7.36894		0.332817	0.361762	0.0289442		3.3686	2.10082	0.394335			0.291776	0.600002	0.308226		0.0410416	0.23824	0.279282
31	3.25	13.34	-10.08		r30_r31	-1063.24	ts31	-1063.24	p31	-1063.25		31	3.52032	12.1908	-8.67049		0.270316	1.14919	1.40951		8.31742	8.61465	13.9832			0.524963	1.22857	1.74353		0.254647	0.0793741	0.334021
32	19.16	64.57	-45.4		r32+	-997.906	ts32+	-997.873	p32+	-997.973		32	20.805	63.1949	-42.3899		1.64496	1.37511	3.01007		8.58539	2.12964	6.6301			1.65746	1.04213	2.68959		0.0125024	0.332977	0.320475
33	1.26	7.83	-6.57		r33+	-273	ts33+	-272.997	p33+	-273.009		33	1.37151	7.25219	-5.88068		0.111512	0.577806	0.689318		8.85018	7.37938	10.4919			0.134713	0.414391	0.549104		0.0232009	0.163415	0.140214
34	29.15	2.91	26.24		r34	-861.68	ts34	-861.633	p34_r35	-861.638		34	29.7714	3.12876	26.6426		0.621354	0.218764	0.40259		2.13157	7.51765	1.53426			0.352142	0.365035	0.0128936		0.269212	0.146272	0.389696
35	18.31	-1.41	19.72		p34_r35	-861.638	ts35	-861.61	p35	-821.149		35	17.5804	-1.72805	19.3084		0.729603	0.318047	0.411555		3.98472	22.5565	2.087			0.569321	0.460387	0.108934		0.160282	0.142339	0.302621
									CH4	-40.4581
																MAD	1.22242			%MARE	12.1792
																max	10.3949			max	162.323
																SD	1.57163			SD	21.1633
