# Supplementary material for: Accelerating computations of organometallic reaction energies through hybrid basis sets
Source: Royal Society of Chemistry journal article supplement (doi:10.1039/d3qi00136a), 2023-01-01
Supplement: d3qi00136a4.xlsx [file d3qi00136a4.xlsx]

## Sheet: README
Statistical parameters presented at the end of the spreadsheets include data for reactions 8 and 9. In the manuscript,
these reactions were excluded. For details, see computational methods

## Sheet: SV_P + TZVP_F
MOBH35		(a) J. Phys. Chem. A 2019, 123, 3761-3781
		(b) J. Phys. Chem. A 2019, 123, 6379-6380			* reference values quoted from (b)
METHOD: wB97M-V/SV(P)+def2-TZVP(-f)
REFERENCE VALUES (kcal/mol)*					STRUCTURES & CALCULATED ENERGIES (in hartree)								CALCULATED (in kcal/mol)				ABSOLUTE DEVATION				ARE
REACTION	FWD Barrier	REV Barrier	Reaction Energy		REACTANT		TS		PRODUCT			REACTION	FWD Barrier	REV Barrier	Reaction Energy		FWD Barrier	REV Barrier	Reaction Energy		FWD Barrier	REV Barrier	Reaction Energy
1	26.03	15.4	10.63		r1+	-1860.39	ts1+	-1860.35	p1+	-1860.37		1	26.809	13.1581	13.6509		0.779005	2.2419	3.02091		2.99272	14.5578	28.4187
2	5.58	22.11	-16.53		r2+	-1690.87	ts2+	-1690.86	p2+	-1690.89		2	6.64849	23.3214	-16.6729		1.06849	1.2114	0.14291		19.1485	5.47896	0.864551
3	0.91	27.21	-26.3		r3	-1270.63	ts3	-1270.63	p3	-1270.68		3	1.21231	32.0653	-30.853		0.302308	4.85527	4.55296		33.2206	17.8437	17.3116
4	1.49	8.85	-7.37		r4	-1232.56	ts4	-1232.56	p4	-1232.58		4	0.649462	13.2319	-12.5824		0.840538	4.38189	5.21243		56.4119	49.5129	70.7249
5	4.47	22.77	-18.29		r5	-2746.29	ts5	-2746.29	p5	-2746.32		5	4.41188	21.8159	-17.4041		0.0581167	0.954066	0.885949		1.30015	4.19001	4.8439
6	15.77	14.25	1.52		r6	-2598.65	ts6	-2598.63	p6_r7	-2598.65		6	14.5683	12.8088	1.75951		1.2017	1.44121	0.239511		7.62014	10.1137	15.7573
7	27.94	18.47	9.47		p6_r7	-2598.65	ts7	-2598.6	p7	-2598.63		7	28.93	18.7299	10.2001		0.989997	0.259899	0.730097		3.54329	1.40714	7.70958
8	37.28	35.82	1.46		r8	-2626.72	ts8	-2626.67	p8_r9	-2626.72		8	33.466	30.0958	3.37019		3.81405	5.72423	1.91019		10.2308	15.9806	130.835
9	33	4.93	28.07		p8_r9	-2626.72	ts9	-2626.66	p9	-2626.67		9	33.3157	3.00431	30.3114		0.315682	1.92569	2.24138		0.956613	39.0607	7.98496
10	-5.28	7.67	-12.95		r10	-1143.91	ts10	-1143.92	p10	-1030.59		10	-5.76892	7.12982	-12.8987		0.488921	0.540184	0.0512632		9.25987	7.04282	0.395855
									CO	-113.336
11	34.8	89.6	-54.8		r11	-1249.51	ts11	-1249.45	p11	-1249.6		11	35.0878	91.3588	-56.271		0.287828	1.75881	1.47099		0.827092	1.96296	2.68428
12	-0.63	31.02	-31.65		r12	-1799.88	ts12	-1799.88	p12	-1799.93		12	3.66787	32.8048	-29.137		4.29787	1.78485	2.51303		682.202	5.75385	7.94006
13	22.41	49.69	-27.28		r13	-1683.56	ts13	-1683.52	p13	-1683.6		13	25.1823	50.3507	-25.1684		2.77228	0.660711	2.11157		12.3707	1.32967	7.74037
14	10.33	14.46	-4.13		r14	-1165.37	ts14	-1165.35	p14	-1165.37		14	7.56508	12.835	-5.2699		2.76492	1.62502	1.1399		26.766	11.2381	27.6005
15	20.27	77.23	-56.96		r15	-989.818	ts15	-989.785	p15	-989.913		15	20.8211	80.443	-59.6218		0.551118	3.21297	2.66185		2.71888	4.16026	4.67319
16	34.22	55.4	-21.18		r16	-514.432	ts16	-514.379	p16	-514.473		16	33.032	58.7276	-25.6956		1.18802	3.32757	4.51559		3.47172	6.00645	21.3201
17	21.48	35.47	-13.99		r17	-4993.55	ts17	-4993.51	p17	-4414.91		17	25.6397	31.9443	-6.30456		4.1597	3.52574	7.68544		19.3655	9.94006	54.9353
									PEt3	-578.646
18	25.34	36.05	-10.72		r18	-2717.24	ts18	-2717.19	p18	-2138.59		18	31.0172	33.4087	-2.39152		5.67719	2.6413	8.32848		22.4041	7.32676	77.6911
									PEt3	-578.646
19	12.27	35.81	-23.54		r19	-4992.3	ts19	-4992.28	p19	-4413.69		19	13.7689	32.3212	-18.5523		1.49892	3.48875	4.98768		12.2162	9.7424	21.1881
									PEt3	-578.646
20	13.36	37.72	-24.36		r20	-2715.98	ts20	-2715.96	p20	-2137.37		20	13.6598	33.7935	-20.1337		0.299814	3.92652	4.22633		2.24411	10.4096	17.3495
									PEt3	-578.646
21	9.18	9.2	-0.02		r21	-711.837	ts21	-711.822	p21	-711.837		21	9.54856	9.54974	-0.0011778		0.368564	0.349742	0.0188222		4.01486	3.80154	94.111
22	14.3	29.05	-14.75		r22	-962.289	ts22	-962.264	p22	-962.311		22	16.1345	29.6429	-13.5084		1.83453	0.592909	1.24162		12.8289	2.041	8.41777
23	30.71	21.19	9.52		r23	-1013.68	ts23	-1013.63	p23	-1013.67		23	32.9699	23.4522	9.51771		2.25988	2.26217	0.00229099		7.35876	10.6756	0.024065
24	2.87	16.96	-14.1		r24	-2266.8	ts24	-2266.8	p24	-2266.83		24	2.21305	20.0171	-17.804		0.656947	3.05707	3.70402		22.8901	18.0252	26.2696
25	2.66	12.01	-9.35		r25	-2193.04	ts25	-2193.04	p25	-2193.06		25	1.84627	14.7274	-12.8812		0.813727	2.71743	3.53116		30.5912	22.6264	37.7664
26	25.39	0.19	25.2		r26	-1127.86	ts26	-1127.82	p26	-1127.82		26	26.4896	0.0881062	26.4015		1.09961	0.101894	1.2015		4.33088	53.6283	4.76787
27	13.76	2.39	11.37		r27	-1209.87	ts27	-1209.85	p27	-1209.85		27	13.5373	1.7755	11.7618		0.222709	0.6145	0.391791		1.61853	25.7113	3.44583
28	29.06	16.63	12.43		r28	-1655.9	ts28	-1655.86	p28	-1655.88		28	26.9988	15.4908	11.508		2.06119	1.13921	0.921985		7.09288	6.85031	7.41741
29	14.95	30.89	-15.93		r29	-1657.07	ts29	-1657.05	p29	-1657.09		29	12.7335	29.1993	-16.4658		2.2165	1.69065	0.535842		14.8261	5.47314	3.36373
30	9.88	17.22	-7.34		r30_31	-1063.68	ts30	-1063.67	p30	-1063.69		30	10.124	17.7931	-7.66903		0.244025	0.573056	0.32903		2.46989	3.32785	4.4827
31	3.25	13.34	-10.08		r30_r31	-1063.68	ts31	-1063.68	p31	-1063.7		31	3.31082	12.3423	-9.03152		0.0608176	0.997663	1.04848		1.87131	7.47873	10.4016
32	19.16	64.57	-45.4		r32+	-998.404	ts32+	-998.367	p32+	-998.471		32	22.6836	65.0911	-42.4075		3.52363	0.521143	2.99248		18.3905	0.807098	6.59138
33	1.26	7.83	-6.57		r33+	-273.075	ts33+	-273.073	p33+	-273.09		33	1.12363	10.6078	-9.48414		0.13637	2.77777	2.91414		10.823	35.4759	44.3552
34	29.15	2.91	26.24		r34	-862.106	ts34	-862.062	p34_r35	-862.069		34	27.2253	4.17654	23.0488		1.92466	1.26654	3.1912		6.60261	43.5239	12.1616
35	18.31	-1.41	19.72		p34_r35	-862.069	ts35	-862.043	p35	-821.544		35	16.4163	-5.42437	21.8407		1.89369	4.01437	2.12067		10.3424	284.707	10.7539
									CH4	-40.4903
																MAD	1.85917			%MARE	25.1889
																max	8.32848			max	682.202
																SD	1.64269			SD	72.7859

## Sheet: SVP + TZVP_F
MOBH35		(a) J. Phys. Chem. A 2019, 123, 3761-3781
		(b) J. Phys. Chem. A 2019, 123, 6379-6380			* reference values quoted from (b)
METHOD: wB97M-V/SVP+def2-TZVP(-f)
REFERENCE VALUES (kcal/mol)*					STRUCTURES & CALCULATED ENERGIES (in hartree)								CALCULATED (in kcal/mol)				ABSOLUTE DEVATION				ARE
REACTION	FWD Barrier	REV Barrier	Reaction Energy		REACTANT		TS		PRODUCT			REACTION	FWD Barrier	REV Barrier	Reaction Energy		FWD Barrier	REV Barrier	Reaction Energy		FWD Barrier	REV Barrier	Reaction Energy
1	26.03	15.4	10.63		r1+	-1860.48	ts1+	-1860.44	p1+	-1860.46		1	27.0454	15.211	11.8344		1.01538	0.189042	1.20442		3.90081	1.22754	11.3304
2	5.58	22.11	-16.53		r2+	-1690.96	ts2+	-1690.95	p2+	-1690.98		2	6.90857	22.9358	-16.0272		1.32857	0.825805	0.502764		23.8095	3.73499	3.04152
3	0.91	27.21	-26.3		r3	-1270.68	ts3	-1270.68	p3	-1270.73		3	1.22911	31.5604	-30.3313		0.319106	4.35036	4.03125		35.0666	15.9881	15.328
4	1.49	8.85	-7.37		r4	-1232.61	ts4	-1232.61	p4	-1232.63		4	0.786371	12.7947	-12.0083		0.703629	3.94468	4.63831		47.2235	44.5727	62.935
5	4.47	22.77	-18.29		r5	-2746.38	ts5	-2746.37	p5	-2746.4		5	4.53821	22.0292	-17.491		0.068207	0.740784	0.798991		1.52588	3.25333	4.36846
6	15.77	14.25	1.52		r6	-2598.7	ts6	-2598.68	p6_r7	-2598.69		6	14.7454	12.375	2.37039		1.02461	1.875	0.850389		6.49724	13.1579	55.9467
7	27.94	18.47	9.47		p6_r7	-2598.69	ts7	-2598.65	p7	-2598.68		7	29.0448	18.7061	10.3387		1.10484	0.236106	0.868738		3.95435	1.27832	9.17358
8	37.28	35.82	1.46		r8	-2626.8	ts8	-2626.75	p8_r9	-2626.8		8	33.466	30.0958	3.37019		3.81405	5.72423	1.91019		10.2308	15.9806	130.835
9	33	4.93	28.07		p8_r9	-2626.8	ts9	-2626.75	p9	-2626.75		9	33.3157	3.00431	30.3114		0.315682	1.92569	2.24138		0.956613	39.0607	7.98496
10	-5.28	7.67	-12.95		r10	-1143.99	ts10	-1144	p10	-1030.68		10	-5.57309	7.23436	-12.8075		0.293095	0.435639	0.142544		5.55103	5.67977	1.10073
									CO	-113.336
11	34.8	89.6	-54.8		r11	-1249.57	ts11	-1249.52	p11	-1249.66		11	35.0157	91.0685	-56.0529		0.215675	1.46854	1.25286		0.619755	1.63899	2.28625
12	-0.63	31.02	-31.65		r12	-1799.96	ts12	-1799.96	p12	-1800.01		12	3.99737	32.6638	-28.6664		4.62737	1.64381	2.98356		734.503	5.2992	9.42672
13	22.41	49.69	-27.28		r13	-1683.62	ts13	-1683.58	p13	-1683.66		13	24.8186	51.2684	-26.4498		2.40861	1.57838	0.830225		10.7479	3.17646	3.04335
14	10.33	14.46	-4.13		r14	-1165.42	ts14	-1165.41	p14	-1165.43		14	7.64993	12.9506	-5.30068		2.68007	1.50939	1.17068		25.9446	10.4384	28.3458
15	20.27	77.23	-56.96		r15	-989.849	ts15	-989.816	p15	-989.945		15	20.639	80.9462	-60.3072		0.369021	3.71619	3.34717		1.82053	4.81185	5.87635
16	34.22	55.4	-21.18		r16	-514.459	ts16	-514.407	p16	-514.501		16	32.5407	58.9658	-26.4251		1.67931	3.5658	5.24511		4.90739	6.43646	24.7644
17	21.48	35.47	-13.99		r17	-4993.68	ts17	-4993.64	p17	-4415.01		17	24.658	31.6166	-6.95859		3.178	3.85341	7.03141		14.7952	10.8638	50.2602
									PEt3	-578.681
18	25.34	36.05	-10.72		r18	-2717.37	ts18	-2717.32	p18	-2138.69		18	30.2212	33.2762	-3.05498		4.88123	2.77379	7.66502		19.2629	7.6943	71.502
									PEt3	-578.681
19	12.27	35.81	-23.54		r19	-4992.43	ts19	-4992.41	p19	-4413.78		19	12.918	31.9986	-19.0806		0.647998	3.81138	4.45938		5.28116	10.6433	18.9438
									PEt3	-578.681
20	13.36	37.72	-24.36		r20	-2716.11	ts20	-2716.09	p20	-2137.46		20	13.017	33.6832	-20.6662		0.343011	4.03682	3.69381		2.56745	10.7021	15.1634
									PEt3	-578.681
21	9.18	9.2	-0.02		r21	-711.913	ts21	-711.898	p21	-711.913		21	9.27646	9.27855	-0.00209559		0.0964578	0.0785534	0.0179044		1.05074	0.853841	89.522
22	14.3	29.05	-14.75		r22	-962.389	ts22	-962.363	p22	-962.409		22	16.0157	28.9774	-12.9617		1.71571	0.0726208	1.78834		11.998	0.249985	12.1243
23	30.71	21.19	9.52		r23	-1013.76	ts23	-1013.71	p23	-1013.74		23	33.0553	23.9756	9.07972		2.3453	2.78559	0.440285		7.63694	13.1458	4.62484
24	2.87	16.96	-14.1		r24	-2266.91	ts24	-2266.91	p24	-2266.94		24	2.40855	19.9758	-17.5673		0.461449	3.01583	3.46727		16.0784	17.782	24.5906
25	2.66	12.01	-9.35		r25	-2193.16	ts25	-2193.16	p25	-2193.18		25	1.95908	14.5614	-12.6023		0.700918	2.55136	3.25228		26.3503	21.2436	34.7837
26	25.39	0.19	25.2		r26	-1127.91	ts26	-1127.87	p26	-1127.87		26	26.1231	0.139299	25.9838		0.73314	0.0507011	0.783841		2.88752	26.6848	3.11048
27	13.76	2.39	11.37		r27	-1209.93	ts27	-1209.91	p27	-1209.91		27	12.7251	2.35199	10.3731		1.03492	0.0380126	0.996903		7.52119	1.59049	8.76784
28	29.06	16.63	12.43		r28	-1655.97	ts28	-1655.93	p28	-1655.95		28	26.9843	15.7219	11.2624		2.07569	0.908088	1.1676		7.14276	5.46054	9.39339
29	14.95	30.89	-15.93		r29	-1657.14	ts29	-1657.12	p29	-1657.17		29	12.7489	28.6562	-15.9072		2.20106	2.23381	0.0227547		14.7228	7.23151	0.142842
30	9.88	17.22	-7.34		r30_31	-1063.74	ts30	-1063.73	p30	-1063.76		30	9.76698	17.7043	-7.93735		0.113025	0.484327	0.597351		1.14397	2.81258	8.1383
31	3.25	13.34	-10.08		r30_r31	-1063.74	ts31	-1063.74	p31	-1063.76		31	3.34434	12.3208	-8.97651		0.094339	1.01915	1.10349		2.90274	7.63983	10.9474
32	19.16	64.57	-45.4		r32+	-998.435	ts32+	-998.399	p32+	-998.504		32	22.3416	65.3981	-43.0565		3.18161	0.828146	2.34347		16.6055	1.28256	5.16182
33	1.26	7.83	-6.57		r33+	-273.119	ts33+	-273.117	p33+	-273.135		33	1.16736	10.9415	-9.77416		0.0926439	3.11151	3.20416		7.35269	39.7383	48.7695
34	29.15	2.91	26.24		r34	-862.128	ts34	-862.085	p34_r35	-862.092		34	27.252	4.197	23.055		1.89801	1.287	3.18501		6.5112	44.2267	12.138
35	18.31	-1.41	19.72		p34_r35	-862.092	ts35	-862.066	p35	-821.569		35	16.4115	-3.80402	20.2155		1.8985	2.39402	0.495515		10.3687	169.788	2.51275
									CH4	-40.4903
																MAD	1.75799			%MARE	23.6304
																max	7.66502			max	734.503
																SD	1.56416			SD	74.3571

## Sheet: SVP + TZVPP
MOBH35		(a) J. Phys. Chem. A 2019, 123, 3761-3781
		(b) J. Phys. Chem. A 2019, 123, 6379-6380			* reference values quoted from (b)
METHOD: wB97M-V/SVP+def2-TZVP(-f)
REFERENCE VALUES (kcal/mol)*					STRUCTURES & CALCULATED ENERGIES (in hartree)								CALCULATED (in kcal/mol)				ABSOLUTE DEVATION				ARE
REACTION	FWD Barrier	REV Barrier	Reaction Energy		REACTANT		TS		PRODUCT			REACTION	FWD Barrier	REV Barrier	Reaction Energy		FWD Barrier	REV Barrier	Reaction Energy		FWD Barrier	REV Barrier	Reaction Energy
1	26.03	15.4	10.63		r1+	-1860.49	ts1+	-1860.45	p1+	-1860.47		1	27.0705	14.5215	12.549		1.04053	0.87847	1.919		3.99741	5.70435	18.0526
2	5.58	22.11	-16.53		r2+	-1690.97	ts2+	-1690.96	p2+	-1690.99		2	6.78613	23.1997	-16.4136		1.20613	1.08969	0.11644		21.6152	4.92849	0.704417
3	0.91	27.21	-26.3		r3	-1270.69	ts3	-1270.69	p3	-1270.74		3	1.32271	31.281	-29.9583		0.412707	4.071	3.6583		45.3524	14.9614	13.9099
4	1.49	8.85	-7.37		r4	-1232.62	ts4	-1232.62	p4	-1232.64		4	0.991893	12.8581	-11.8662		0.498107	4.00807	4.49618		33.43	45.2889	61.0065
5	4.47	22.77	-18.29		r5	-2746.38	ts5	-2746.37	p5	-2746.41		5	4.30146	21.9108	-17.6094		0.168545	0.859175	0.680631		3.77057	3.77328	3.72133
6	15.77	14.25	1.52		r6	-2598.71	ts6	-2598.69	p6_r7	-2598.71		6	15.138	12.2447	2.89327		0.632036	2.00531	1.37327		4.00784	14.0723	90.3469
7	27.94	18.47	9.47		p6_r7	-2598.71	ts7	-2598.66	p7	-2598.69		7	28.751	19.2945	9.45643		0.810979	0.824548	0.0135684		2.90257	4.46425	0.143278
8	37.28	35.82	1.46		r8	-2626.81	ts8	-2626.76	p8_r9	-2626.81		8	33.7743	29.6558	4.11852		3.50566	6.16418	2.65852		9.40358	17.2088	182.091
9	33	4.93	28.07		p8_r9	-2626.81	ts9	-2626.75	p9	-2626.76		9	33.899	3.15473	30.7443		0.89901	1.77527	2.67428		2.72427	36.0095	9.52717
10	-5.28	7.67	-12.95		r10	-1144	ts10	-1144.01	p10	-1030.68		10	-4.97549	6.5929	-11.5684		0.30451	1.0771	1.38161		5.76724	14.0431	10.6688
									CO	-113.338
11	34.8	89.6	-54.8		r11	-1249.58	ts11	-1249.52	p11	-1249.67		11	35.9328	91.6742	-55.7414		1.13279	2.0742	0.941413		3.25514	2.31496	1.71791
12	-0.63	31.02	-31.65		r12	-1799.97	ts12	-1799.97	p12	-1800.02		12	3.85426	33.4523	-29.5981		4.48426	2.43235	2.05191		711.787	7.84122	6.48312
13	22.41	49.69	-27.28		r13	-1683.62	ts13	-1683.58	p13	-1683.67		13	24.3006	51.6651	-27.3645		1.89065	1.97513	0.084482		8.43662	3.9749	0.309685
14	10.33	14.46	-4.13		r14	-1165.43	ts14	-1165.41	p14	-1165.44		14	8.54387	13.2063	-4.66239		1.78613	1.25374	0.532392		17.2907	8.67041	12.8909
15	20.27	77.23	-56.96		r15	-989.854	ts15	-989.821	p15	-989.951		15	20.3399	81.7787	-61.4388		0.0698853	4.54867	4.47879		0.344772	5.88977	7.86304
16	34.22	55.4	-21.18		r16	-514.465	ts16	-514.413	p16	-514.507		16	32.925	59.2516	-26.3265		1.29498	3.85156	5.14654		3.78427	6.95228	24.2991
17	21.48	35.47	-13.99		r17	-4993.7	ts17	-4993.66	p17	-4415.03		17	25.1616	32.3845	-7.22291		3.6816	3.08549	6.76709		17.1397	8.69887	48.3709
									PEt3	-578.685
18	25.34	36.05	-10.72		r18	-2717.39	ts18	-2717.34	p18	-2138.71		18	29.5074	33.7278	-4.22041		4.16739	2.3222	6.49959		16.4459	6.44161	60.6305
									PEt3	-578.685
19	12.27	35.81	-23.54		r19	-4992.45	ts19	-4992.43	p19	-4413.79		19	13.5517	32.7684	-19.2167		1.28166	3.04163	4.32329		10.4455	8.49379	18.3657
									PEt3	-578.685
20	13.36	37.72	-24.36		r20	-2716.12	ts20	-2716.1	p20	-2137.47		20	12.5456	34.1544	-21.6088		0.81439	3.56559	2.7512		6.09573	9.45278	11.2939
									PEt3	-578.685
21	9.18	9.2	-0.02		r21	-711.921	ts21	-711.906	p21	-711.921		21	9.48933	9.49101	-0.0016837		0.309326	0.29101	0.0183163		3.36957	3.16315	91.5815
22	14.3	29.05	-14.75		r22	-962.399	ts22	-962.374	p22	-962.42		22	15.7818	29.3298	-13.5481		1.48176	0.27982	1.20194		10.3619	0.963236	8.14873
23	30.71	21.19	9.52		r23	-1013.77	ts23	-1013.71	p23	-1013.75		23	33.0537	24.2248	8.82885		2.34369	3.03484	0.691146		7.63168	14.322	7.25994
24	2.87	16.96	-14.1		r24	-2266.92	ts24	-2266.92	p24	-2266.95		24	3.23067	19.5257	-16.2951		0.36067	2.56574	2.19507		12.5669	15.1282	15.5679
25	2.66	12.01	-9.35		r25	-2193.17	ts25	-2193.17	p25	-2193.19		25	2.61218	14.1433	-11.5312		0.0478224	2.13334	2.18117		1.79783	17.7631	23.328
26	25.39	0.19	25.2		r26	-1127.91	ts26	-1127.87	p26	-1127.87		26	26.2729	0.153716	26.1192		0.882898	0.0362841	0.919182		3.47735	19.0969	3.64755
27	13.76	2.39	11.37		r27	-1209.93	ts27	-1209.91	p27	-1209.92		27	12.7611	2.61099	10.1501		0.998883	0.22099	1.21987		7.25932	9.24646	10.7289
28	29.06	16.63	12.43		r28	-1655.98	ts28	-1655.93	p28	-1655.96		28	28.4269	16.6697	11.7572		0.633097	0.0397456	0.672842		2.17858	0.238999	5.41305
29	14.95	30.89	-15.93		r29	-1657.15	ts29	-1657.13	p29	-1657.18		29	13.8031	29.9521	-16.149		1.14688	0.937892	0.218987		7.67143	3.03623	1.37468
30	9.88	17.22	-7.34		r30_31	-1063.75	ts30	-1063.73	p30	-1063.76		30	9.35745	17.0171	-7.65962		0.522548	0.202931	0.319617		5.28894	1.17846	4.35446
31	3.25	13.34	-10.08		r30_r31	-1063.75	ts31	-1063.74	p31	-1063.76		31	3.54941	11.5854	-8.03599		0.299412	1.7546	2.04401		9.21269	13.1529	20.2779
32	19.16	64.57	-45.4		r32+	-998.439	ts32+	-998.405	p32+	-998.509		32	21.81	65.5915	-43.7815		2.65001	1.0215	1.61851		13.831	1.582	3.565
33	1.26	7.83	-6.57		r33+	-273.122	ts33+	-273.121	p33+	-273.139		33	0.769691	11.2857	-10.516		0.490309	3.45566	3.94597		38.9134	44.1336	60.0604
34	29.15	2.91	26.24		r34	-862.135	ts34	-862.092	p34_r35	-862.099		34	26.5829	4.34241	22.2405		2.56709	1.43241	3.9995		8.80648	49.2237	15.242
35	18.31	-1.41	19.72		p34_r35	-862.099	ts35	-862.072	p35	-821.573		35	17.0765	-4.02152	21.0981		1.23345	2.61152	1.37807		6.73649	185.214	6.98819
									CH4	-40.4923
																MAD	1.70139			%MARE	24.1301
																max	6.76709			max	711.787
																SD	1.47689			SD	73.6869
