# Supplementary material for: Accelerating computations of organometallic reaction energies through hybrid basis sets
Source: Royal Society of Chemistry journal article supplement (doi:10.1039/d3qi00136a), 2023-01-01
Supplement: d3qi00136a5.pdf [file d3qi00136a5.pdf]

## SUPPORTING INFORMATION

### Accelerating Computations of Organometallic Reaction Energies through Hybrid Basis Sets

Júlia M. A. Alves,<sup>a,#</sup> Ivanna G. R. Domingos,<sup>b,#</sup> Marcelo T. de Oliveira<sup>\*a,c</sup>

a – São Carlos Institute of Chemistry, University of São Paulo, Av. Trabalhador São Carlense 400,  
13566–590, São Carlos, SP, Brazil

b – Institute of Chemistry, University of São Paulo, Av. Prof. Lineu Prestes 748,  
05508–000, São Paulo, SP, Brazil

c – Department of Chemistry and Physics, La Trobe Institute of Molecular Sciences,  
La Trobe University, Melbourne, Victoria 3086, Australia

# These authors contributed equally.

*mtavareso@usp.br*

|                                                                      |        |
|----------------------------------------------------------------------|--------|
| Basis set partition for reactions in MOBH35 (Table S1) .....         | S3-S5  |
| Formulas for statistical parameters .....                            | S6     |
| Statistical parameters for all basis sets tested (Table S2-S9) ..... | S7-S10 |
| Relative computational cost (Table S10) .....                        | S11    |

**Table S1.** Transition metal reactions in MOBH35 data set. Basis set partition is shown with atoms using the larger basis set in blue.

| #   | REACTION | #    | REACTION |
|-----|----------|------|----------|
| 1   |          | 9**  |          |
| 2   |          | 10** |          |
| 3   |          | 11   |          |
| 4   |          | 12   |          |
| 5   |          | 13   |          |
| 6** |          | 14   |          |
| 7** |          | 15   |          |
| 8   |          | 16   |          |

**Table S1.** Transition metal reactions in MOBH35 data set. Basis set partition is shown with atoms using the larger basis set in blue (continued).

| #   | REACTION |
|-----|----------|
| 17* |          |
| 18* |          |
| 19* |          |
| 20* |          |

  

| #  | REACTION | #  | REACTION |
|----|----------|----|----------|
| 21 |          | 24 |          |
| 22 |          | 25 |          |
| 23 |          | 26 |          |

**Table S1.** Transition metal reactions in MOBH35 data set. Basis set partition is shown with atoms using the larger basis set in blue (continued).

| #    | REACTION | #    | REACTION |
|------|----------|------|----------|
| 27   |          | 32   |          |
| 28   |          | 33   |          |
| 29   |          | 34** |          |
| 30** |          | 35** |          |
| 31** |          |      |          |

\* In some cases, we were unable to locate exact atoms involved in the reaction. Therefore, we selected all phosphorus atoms for reactions #17–20.

\*\* We favored an extended selection for those cases that the product of one reaction is the reactant in the following (6 and 7, 9 and 10, 30 and 31, 34 and 35).

### Statistical parameters

- Mean absolute deviation (MAD):

$$MAD = \frac{1}{N} \sum_{i=1}^N |\sigma_i - \sigma_i^{ref}|$$

- Percentage mean absolute relative error (%MARE):

$$\%MARE = \left( \frac{1}{N} \sum_{i=1}^N \left| \frac{\sigma_i - \sigma_i^{ref}}{|\sigma_i^{ref}|} \right| \right) \times 100$$

**Table S2.** Mean absolute deviation (MAD), standard deviation (SD) and maximum deviation (max) parameters (kcal mol<sup>-1</sup>) for various basis sets using  $\omega$ B97M-V. Values are reported including and excluding reactions 8 and 9 in MOBH35 dataset.

| Basis Set     | Excluding Reactions #8 and #9 |      |       | Including Reaction #8 and #9 |      |       |
|---------------|-------------------------------|------|-------|------------------------------|------|-------|
|               | MAD                           | SD   | max   | MAD                          | SD   | max   |
| def2-SV(P)    | 2.96                          | 2.30 | 9.43  | 3.00                         | 2.26 | 9.43  |
| def2-SVP      | 2.33                          | 2.05 | 8.15  | 2.40                         | 2.04 | 8.15  |
| ma-def2-SVP   | 2.26                          | 2.08 | 9.70  | 2.34                         | 2.08 | 9.70  |
| def2-SVPPD    | 2.51                          | 2.95 | 15.66 | 2.57                         | 2.91 | 15.66 |
| def2-TZVP(-f) | 1.61                          | 1.42 | 6.66  | 1.67                         | 1.47 | 6.66  |
| def2-TZVP     | 1.64                          | 1.40 | 7.24  | 1.72                         | 1.45 | 7.24  |
| def2-TZVPP    | 1.55                          | 1.36 | 6.54  | 1.63                         | 1.42 | 6.54  |
| def2-TZVPPD*  | 1.52                          | 1.32 | 6.03  | 1.61                         | 1.38 | 6.33  |
| def2-QZVPP    | 1.51                          | 1.30 | 5.41  | 1.60                         | 1.37 | 6.34  |

\* For some rare cases (r8, ts8, p9 and ts9) while using  $\omega$ B97M-V/def2-TZVPPD, StrongSCF criteria was required for convergence instead of TightSCF. Extensive testing showed only numerical differences with no impact on reported energies.

**Table S3.** Percentage mean absolute relative error (%MARE), standard deviation (SD) and maximum deviation (max) parameters (%) for various basis sets using  $\omega$ B97M-V. Values are reported including and excluding reactions 8 and 9 in MOBH35 dataset.

| Basis Set     | Excluding Reactions #8 and #9 |        |         | Including Reaction #8 and #9 |        |         |
|---------------|-------------------------------|--------|---------|------------------------------|--------|---------|
|               | %MARE                         | SD     | max     | %MARE                        | SD     | max     |
| def2-SV(P)    | 41.41                         | 156.77 | 1281.71 | 42.49                        | 153.38 | 1281.71 |
| def2-SVP      | 30.67                         | 89.88  | 875.07  | 32.50                        | 91.01  | 875.07  |
| ma-def2-SVP   | 29.59                         | 86.86  | 838.35  | 31.34                        | 87.67  | 838.35  |
| def2-SVPPD    | 28.24                         | 60.00  | 548.29  | 30.97                        | 66.90  | 548.29  |
| def2-TZVP(-f) | 21.48                         | 78.11  | 773.91  | 22.32                        | 76.68  | 773.91  |
| def2-TZVP     | 22.05                         | 82.44  | 818.42  | 23.31                        | 81.49  | 818.42  |
| def2-TZVPP    | 21.35                         | 76.63  | 758.62  | 22.70                        | 76.06  | 758.62  |
| def2-TZVPPD*  | 21.11                         | 75.47  | 747.19  | 22.47                        | 74.96  | 747.10  |
| def2-QZVPP    | 21.61                         | 78.00  | 772.72  | 22.88                        | 77.21  | 772.72  |

\* For some rare cases (r8, ts8, p9 and ts9) while using  $\omega$ B97M-V/def2-TZVPPD, StrongSCF criteria was required for convergence instead of TightSCF. Extensive testing showed only numerical differences with no impact on reported energies.

**Table S4.** Mean absolute deviation (MAD), standard deviation (SD) and maximum deviation (max) parameters (kcal mol<sup>-1</sup>) for various basis sets using revDOD-PBEP86-D4. Values are reported including and excluding reactions 8 and 9 in MOBH35 dataset.

| <b>Basis Set</b> | <i>Excluding Reactions #8 and #9</i> |           |            | <i>Including Reaction #8 and #9</i> |           |            |
|------------------|--------------------------------------|-----------|------------|-------------------------------------|-----------|------------|
|                  | <b>MAD</b>                           | <b>SD</b> | <b>max</b> | <b>MAD</b>                          | <b>SD</b> | <b>max</b> |
| def2-SVP         | 1.92                                 | 1.75      | 9.25       | 2.02                                | 1.91      | 9.25       |
| def2-TZVP(-f)    | 1.49                                 | 1.58      | 7.05       | 1.62                                | 1.84      | 11.32      |
| def2-TZVP        | 1.45                                 | 1.51      | 6.84       | 1.57                                | 1.76      | 10.76      |
| def2-TZVPP       | 1.23                                 | 1.46      | 6.71       | 1.37                                | 1.73      | 10.66      |
| def2-QZVPP       | 1.04                                 | 1.11      | 4.98       | 1.18                                | 1.46      | 10.21      |

**Table S5.** Percentage mean absolute relative error (%MARE), standard deviation (SD) and maximum deviation (max) parameters (kcal mol<sup>-1</sup>) for various basis sets using revDOD-PBEP86-D4. Values are reported including and excluding reactions 8 and 9 in MOBH35 dataset.

| <b>Basis Set</b> | <i>Excluding Reactions #8 and #9</i> |           |            | <i>Including Reaction #8 and #9</i> |           |            |
|------------------|--------------------------------------|-----------|------------|-------------------------------------|-----------|------------|
|                  | <b>%MARE</b>                         | <b>SD</b> | <b>max</b> | <b>%MARE</b>                        | <b>SD</b> | <b>max</b> |
| def2-SV(P)       | 20.19                                | 35.65     | 289.55     | 22.31                               | 39.13     | 289.55     |
| def2-TZVP(-f)    | 13.58                                | 17.01     | 100.00     | 15.47                               | 22.53     | 159.96     |
| def2-TZVP        | 12.61                                | 14.91     | 89.40      | 14.43                               | 21.15     | 163.99     |
| def2-TZVPP       | 11.16                                | 14.38     | 86.60      | 13.05                               | 20.89     | 164.03     |
| def2-QZVPP       | 9.67                                 | 12.65     | 86.01      | 11.86                               | 20.38     | 161.12     |



**Table S6.** Mean absolute deviation (MAD), standard deviation (SD) and maximum deviation (max) parameters (kcal mol<sup>-1</sup>) for various hybrid basis sets using  $\omega$ B97M-V. Large basis set located in atoms directly involved in the reaction. Values are reported including and excluding reactions 8 and 9 in MOBH35 dataset.

| <b>Basis Set</b>         | <i>Excluding Reactions #8 and #9</i> |           |            | <i>Including Reaction #8 and #9</i> |           |            |
|--------------------------|--------------------------------------|-----------|------------|-------------------------------------|-----------|------------|
|                          | <b>MAD</b>                           | <b>SD</b> | <b>max</b> | <b>MAD</b>                          | <b>SD</b> | <b>max</b> |
| def2-SV(P)/def2-TZVP(-f) | 1.82                                 | 1.63      | 8.33       | 1.86                                | 1.64      | 8.33       |
| def2-SVP/def2-TZVP(-f)   | 1.71                                 | 1.54      | 7.67       | 1.76                                | 1.56      | 7.67       |
| def2-SVP/def2-TZVPP      | 1.64                                 | 1.44      | 6.77       | 1.70                                | 1.48      | 6.77       |

**Table S7.** Percentage mean absolute relative error (%MARE), standard deviation (SD) and maximum deviation (max) parameters (kcal mol<sup>-1</sup>) for various hybrid basis sets using  $\omega$ B97M-V. Large basis set located in atoms directly involved in the reaction. Values are reported including and excluding reactions 8 and 9 in MOBH35 dataset.

| <b>Basis Set</b>         | <i>Excluding Reactions #8 and #9</i> |           |            | <i>Including Reaction #8 and #9</i> |           |            |
|--------------------------|--------------------------------------|-----------|------------|-------------------------------------|-----------|------------|
|                          | <b>%MARE</b>                         | <b>SD</b> | <b>max</b> | <b>%MARE</b>                        | <b>SD</b> | <b>max</b> |
| def2-SV(P)/def2-TZVP(-f) | 24.64                                | 74.12     | 682.20     | 25.19                               | 72.79     | 682.20     |
| def2-SVP/def2-TZVP(-f)   | 22.99                                | 75.74     | 734.50     | 23.63                               | 74.36     | 734.50     |
| def2-SVP/def2-TZVPP      | 23.00                                | 74.13     | 711.79     | 24.13                               | 73.69     | 711.79     |

**Table S8.** Mean absolute deviation (MAD), standard deviation (SD) and maximum deviation (max) parameters (kcal mol<sup>-1</sup>) for various hybrid basis sets using revDOD-PBEP86-D4. Large basis set located in atoms directly involved in the reaction. Values are reported including and excluding reactions 8 and 9 in MOBH35 dataset.

| <b>Basis Set</b>         | <i>Excluding Reactions #8 and #9</i> |           |            | <i>Including Reaction #8 and #9</i> |           |            |
|--------------------------|--------------------------------------|-----------|------------|-------------------------------------|-----------|------------|
|                          | <b>MAD</b>                           | <b>SD</b> | <b>max</b> | <b>MAD</b>                          | <b>SD</b> | <b>max</b> |
| def2-TZVP(-f)/def2-QZVPP | 1.14                                 | 1.34      | 6.02       | 1.29                                | 1.65      | 10.79      |
| def2-TZVP/def2-QZVPP     | 1.09                                 | 1.25      | 5.63       | 1.23                                | 1.57      | 10.37      |
| def2-TZVPP/def2-QZVPP    | 1.08                                 | 1.26      | 5.63       | 1.22                                | 1.57      | 10.39      |

**Table S9.** Percentage mean absolute relative error (%MARE), standard deviation (SD) and maximum deviation (max) parameters (kcal mol<sup>-1</sup>) for various hybrid basis sets using revDOD-PBEP86-D4. Large basis set located in atoms directly involved in the reaction. Values are reported including and excluding reactions 8 and 9 in MOBH35 dataset.

| <b>Basis Set</b>         | <i>Excluding Reactions #8 and #9</i> |           |            | <i>Including Reaction #8 and #9</i> |           |            |
|--------------------------|--------------------------------------|-----------|------------|-------------------------------------|-----------|------------|
|                          | <b>%MARE</b>                         | <b>SD</b> | <b>max</b> | <b>%MARE</b>                        | <b>SD</b> | <b>max</b> |
| def2-TZVP(-f)/def2-QZVPP | 11.90                                | 20.32     | 133.63     | 13.94                               | 25.32     | 163.82     |
| def2-TZVP/def2-QZVPP     | 11.04                                | 17.68     | 118.48     | 13.13                               | 162.37    | 23.45      |
| def2-TZVPP/def2-QZVPP    | 10.01                                | 14.02     | 85.74      | 12.18                               | 21.16     | 162.32     |

**Table S10.** Comparison of computational times (seconds) for some medium-sized systems with various methods. The calculations were performed on 10 Intel E5-2630v4 cores with 12 GB RAM per core [*nprocs*=20; *maxcore*=6000].<sup>1</sup>

| <b>Method</b>            | <b>r26</b><br><i>(33 atoms)</i> | <b>p22</b><br><i>(60 atoms)</i> | <b>p24</b><br><i>(86 atoms)</i> |
|--------------------------|---------------------------------|---------------------------------|---------------------------------|
| <b>ωB97M-V/</b>          |                                 |                                 |                                 |
| def2-TZVPP               | 163                             | 596                             | 1916                            |
| def2-SVP/ def2-TZVPP     | 60                              | 198                             | 598                             |
| <i>Speed-up</i>          | 2.7                             | 3.0                             | 3.2                             |
| <b>revDOD-PBEP86-D4/</b> |                                 |                                 |                                 |
| def2-QZVPP               | 434                             | 2274                            | 12325                           |
| def2-TZVP(-f)/def2-QZVPP | 74                              | 320                             | 1255                            |
| <i>Speed-up</i>          | 5.9                             | 7.1                             | 9.8-fold faster                 |

<sup>1</sup> Equipped with a solid-state drive (SSD) Samsung 960 PRO M.2 with 512 GB of storage.

**Table S11.** Comparison of statistical parameters for ωB97M-V/def2-SVP with and without the application of the RIJCOSX approximation.

| <b>Method</b>                   | <b>MAD</b> | <b>SD</b> | <b>max</b> |
|---------------------------------|------------|-----------|------------|
| <b>RIJCOSX-ωB97M-V/def2-SVP</b> | 2.40       | 2.04      | 8.19       |
| <b>ωB97M-V/def2-SVP</b>         | 2.33       | 2.05      | 8.15       |
